# Supplementary material for: Symmetric dicyanobenzothiadiazole (DCBT) dyes with a 1.5 eV excited state reduction potential range
Source: PubMed Central journal article supplement — RSC Adv. 2024 Feb 21;14(10):6521–31. doi: 10.1039/d3ra06575h (PMC10880648; doi:10.1039/d3ra06575h), 2024-02-21
Supplement: RA-014-D3RA06575H-s001.pdf [file RA-014-D3RA06575H-s001.pdf]

# Symmetric Dicyanobenzothiadiazole (DCBT) Dyes with 1.5 V

## Excited State Reduction Potential Range

Qing Yun Li,<sup>1</sup> Ethan C. Lambert,<sup>1</sup> Ravinder Kaur,<sup>1</sup> Nathan I. Hammer,<sup>1</sup> and Jared H. Delcamp<sup>\*,1,2</sup>

1. Department of Chemistry and Biochemistry, 322 Coulter Hall University of Mississippi, University, MS 38677, USA

2. Materials and Manufacturing Directorate, Air Force Research Laboratory, 2230 Tenth Street Wright-Patterson AFB, OH 45433, USA

Corresponding author email: [delcamp@olemiss.edu](mailto:delcamp@olemiss.edu)

**Table of Contents:**

|                                                               |     |
|---------------------------------------------------------------|-----|
| 1. Computational Data                                         | S3  |
| 2. Steady-State Optical Spectroscopy and Electrochemical Data | S5  |
| 3. NMR Spectra                                                | S18 |
| 4. XYZ coordinates, Frequency, and Total Energy Information   | S35 |
| 5. Time-Correlated Single Photon Counting Kinetics/Fitting    | S51 |

## 1. Computational Data

(XYZ coordinates, frequency information, and total energies are found at the end of this document.)

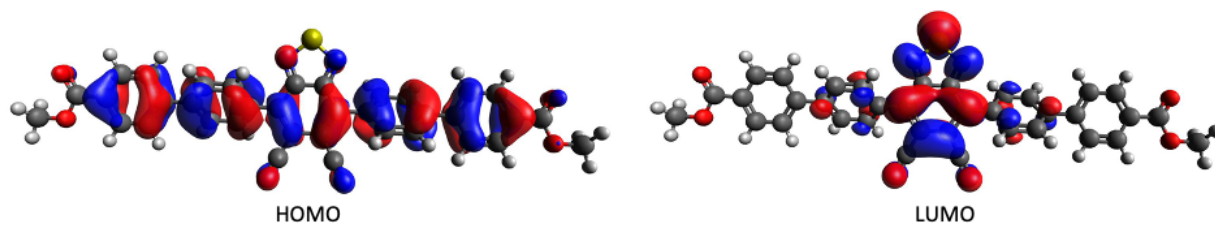

**Figure S1:** HOMO and LUMO orbitals of (Ar-Ar-Ester)<sub>2</sub>DCBT.

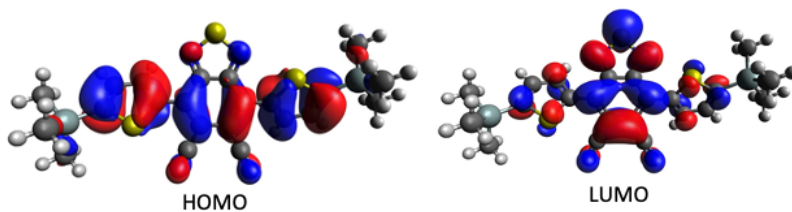

**Figure S2:** HOMO and LUMO orbitals of (TMS-thio)<sub>2</sub>DCBT.

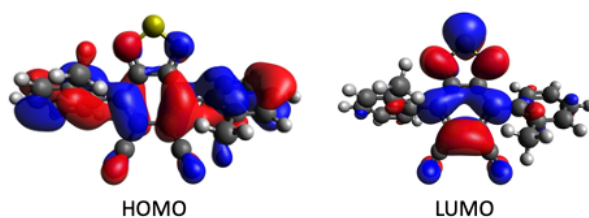

**Figure S3:** HOMO and LUMO orbitals of (tolyl)<sub>2</sub>DCBT.

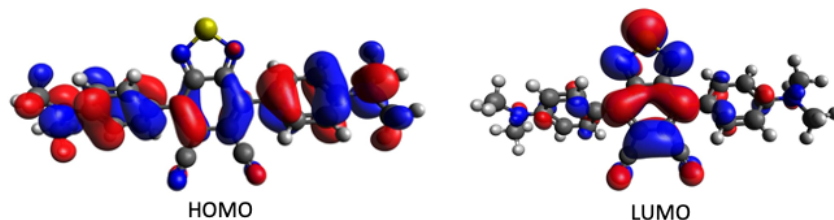

**Figure S4:** HOMO and LUMO orbitals of (DMA)<sub>2</sub>DCBT.

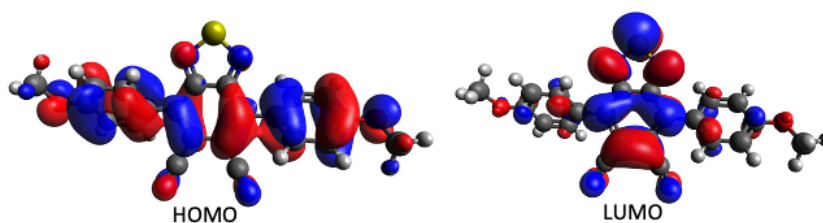

**Figure S5:** HOMO and LUMO orbitals of (*p*-OH<sub>x</sub>)<sub>2</sub>DCBT.

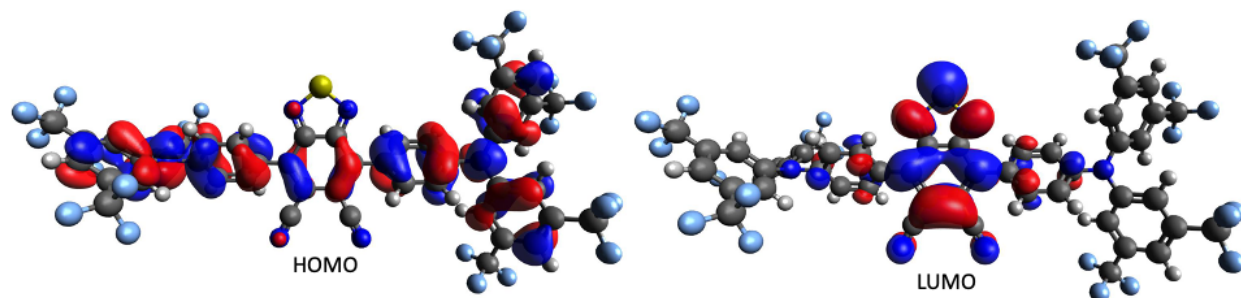

**Figure S6:** HOMO and LUMO orbitals of (TAA-(*m*-CF<sub>3</sub>)<sub>4</sub>)<sub>2</sub>DCBT.

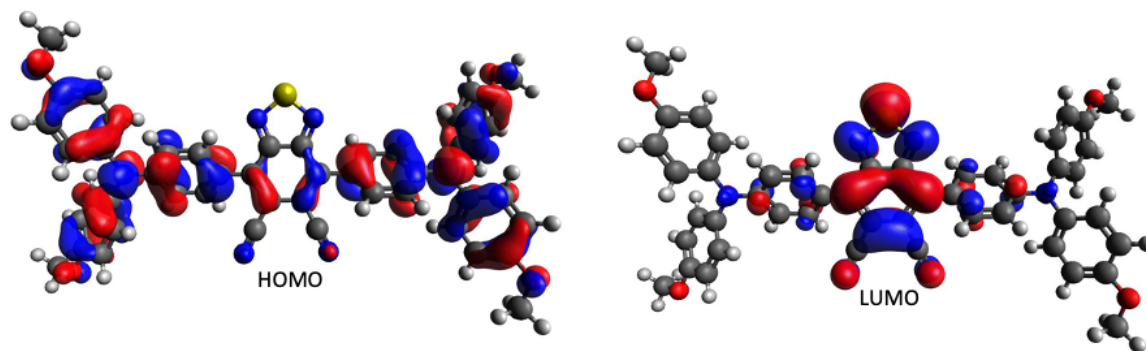

**Figure S7:** HOMO and LUMO orbitals of (TAA-(OHx))<sub>2</sub>DCBT.

**Table S1:** Summary of dipole and dihedral angles at the two aryl-DCBT bonds for the DCBT dyes obtained after DFT geometry optimizations at the M06-2X/6-311G(d,p) level of theory.

| Dye <sup>a</sup>                               | HOMO (eV) | LUMO (eV) | Orbitals <sup>b</sup> | % Cont.         | Vert. Trans. (nm   eV) | Oscillator Strength | Dipole (D) | Dihedral (°) <sup>c</sup> |
|------------------------------------------------|-----------|-----------|-----------------------|-----------------|------------------------|---------------------|------------|---------------------------|
| <i>p</i> -CN                                   | -8.65     | -3.23     | H→L                   | 96%             | 347   3.57             | 0.4667              | 6.1517     | 48.45                     |
| TMS-thio                                       | -7.41     | -2.68     | H→L                   | 98%             | 421   2.95             | 0.5452              | 6.3589     | 36.01                     |
| TAA-(OHx)                                      | -6.13     | -2.29     | H→L<br>H-2→L          | 91%<br>6%       | 495   2.51             | 0.7089              | 6.7772     | 45.33                     |
| Ar-Ar-Ester                                    | -7.79     | -2.75     | H→L<br>H-2→L<br>H-4→L | 90%<br>2%<br>4% | 374   3.32             | 0.7356              | 3.0056     | 47.44                     |
| tolyl                                          | -8.15     | -2.60     | H→L                   | 97%             | 343   3.61             | 0.2192              | 6.2439     | 61.09                     |
| DMA                                            | -6.50     | -2.18     | H→L                   | 96%             | 456   2.72             | 0.5018              | 6.1511     | 44.29                     |
| TAA-( <i>m</i> -CF <sub>3</sub> ) <sub>4</sub> | -7.58     | -3.04     | H→L<br>H-2→L          | 87%<br>8%       | 406   3.05             | 0.7081              | 5.7463     | 47.36                     |
| <i>p</i> -OHx                                  | -7.38     | -2.47     | H→L                   | 97%             | 394   3.15             | 0.3991              | 6.6767     | 46.22                     |

<sup>a</sup>Dyes are coded by their aryl substituents. <sup>b</sup>All transitions are S<sub>0</sub>→S<sub>1</sub>. HOMO is denoted by H and LUMO is denoted by L. <sup>c</sup>Dihedral is the average of both aryl-DCBT bonds.

## 2. Steady-state Optical Spectroscopy and Electrochemical Data

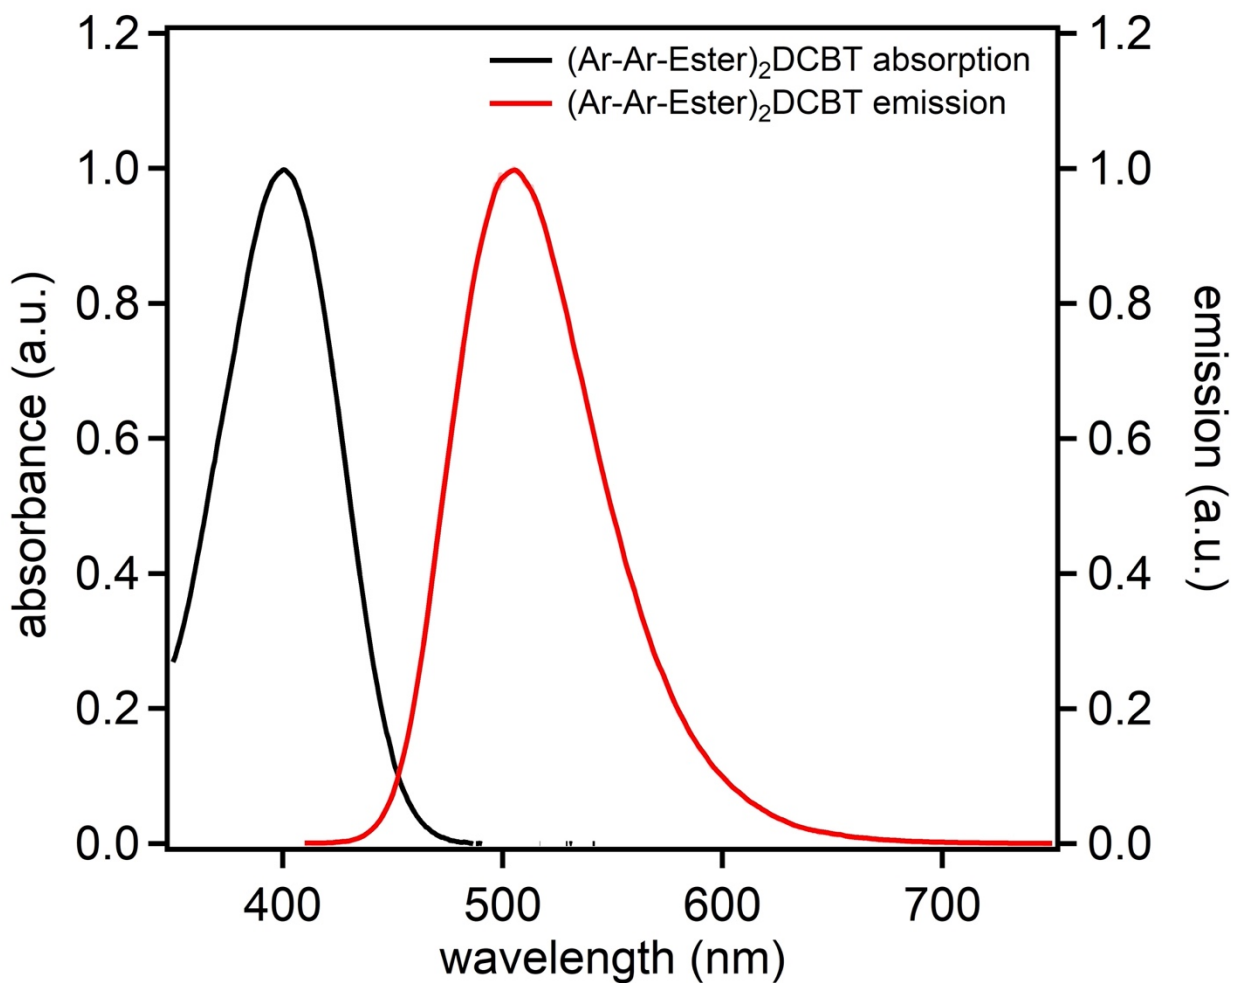

**Figure S8:** Normalized absorption and emission curve plot of (Ar-Ar-Ester)<sub>2</sub>DCBT in dichloromethane.

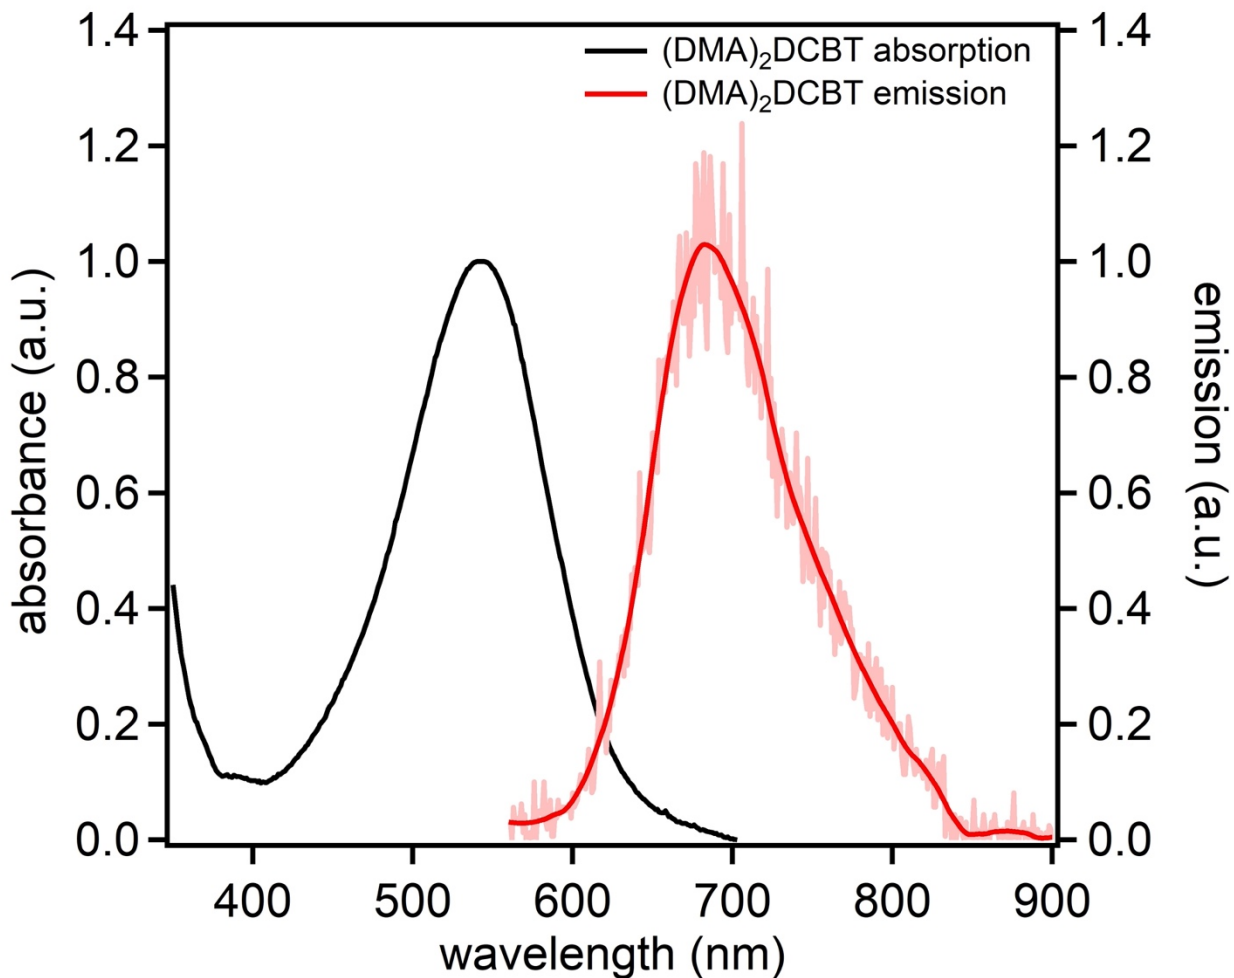

**Figure S9:** Normalized absorption and emission curve plot of (DMA)<sub>2</sub>DCBT in dichloromethane. Raw data is plotted in pink, and a fitted trace is shown in red.

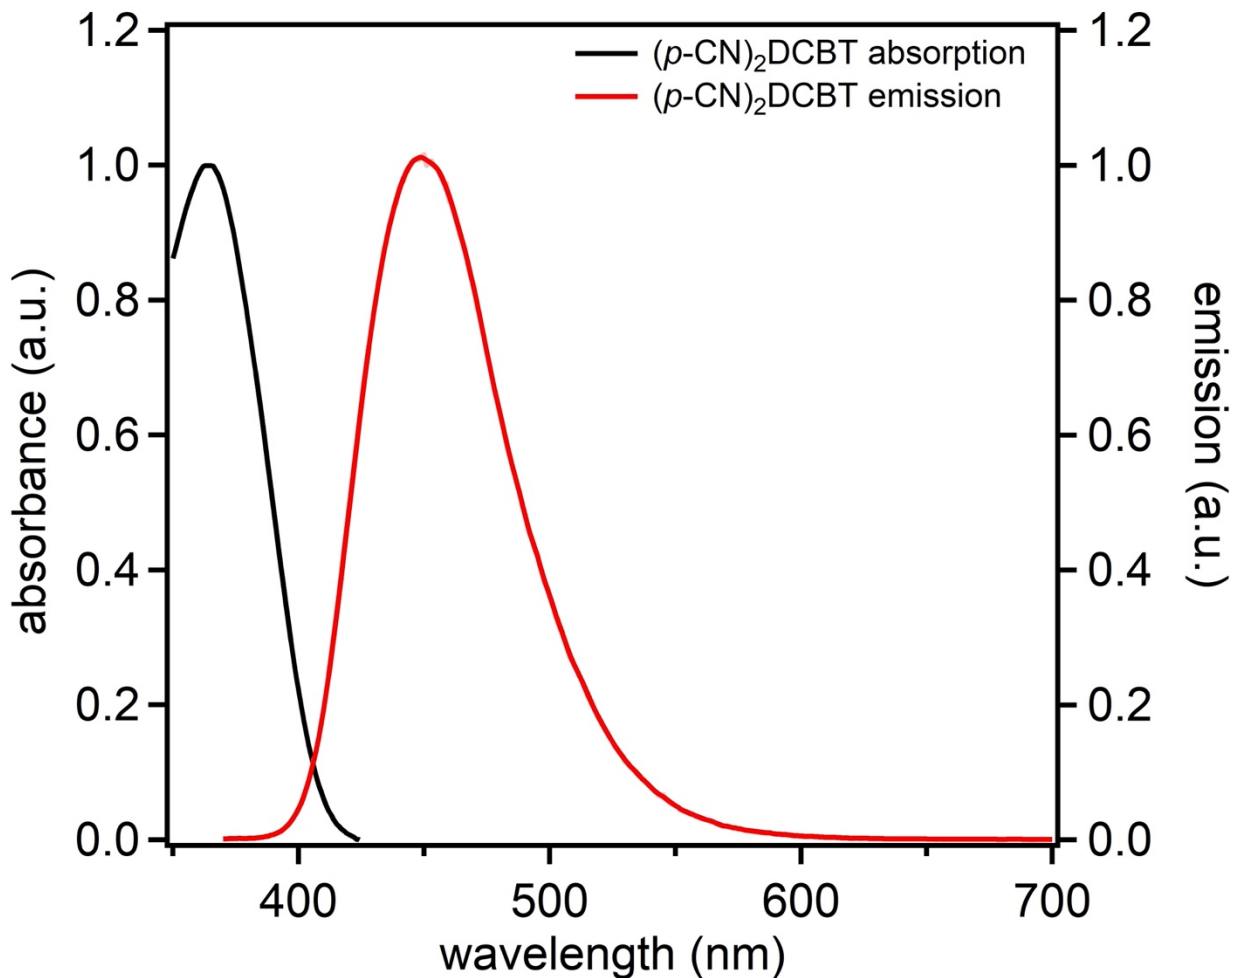

**Figure S10:** Normalized absorption and emission curve plot of (p-CN)<sub>2</sub>DCBT in dichloromethane.

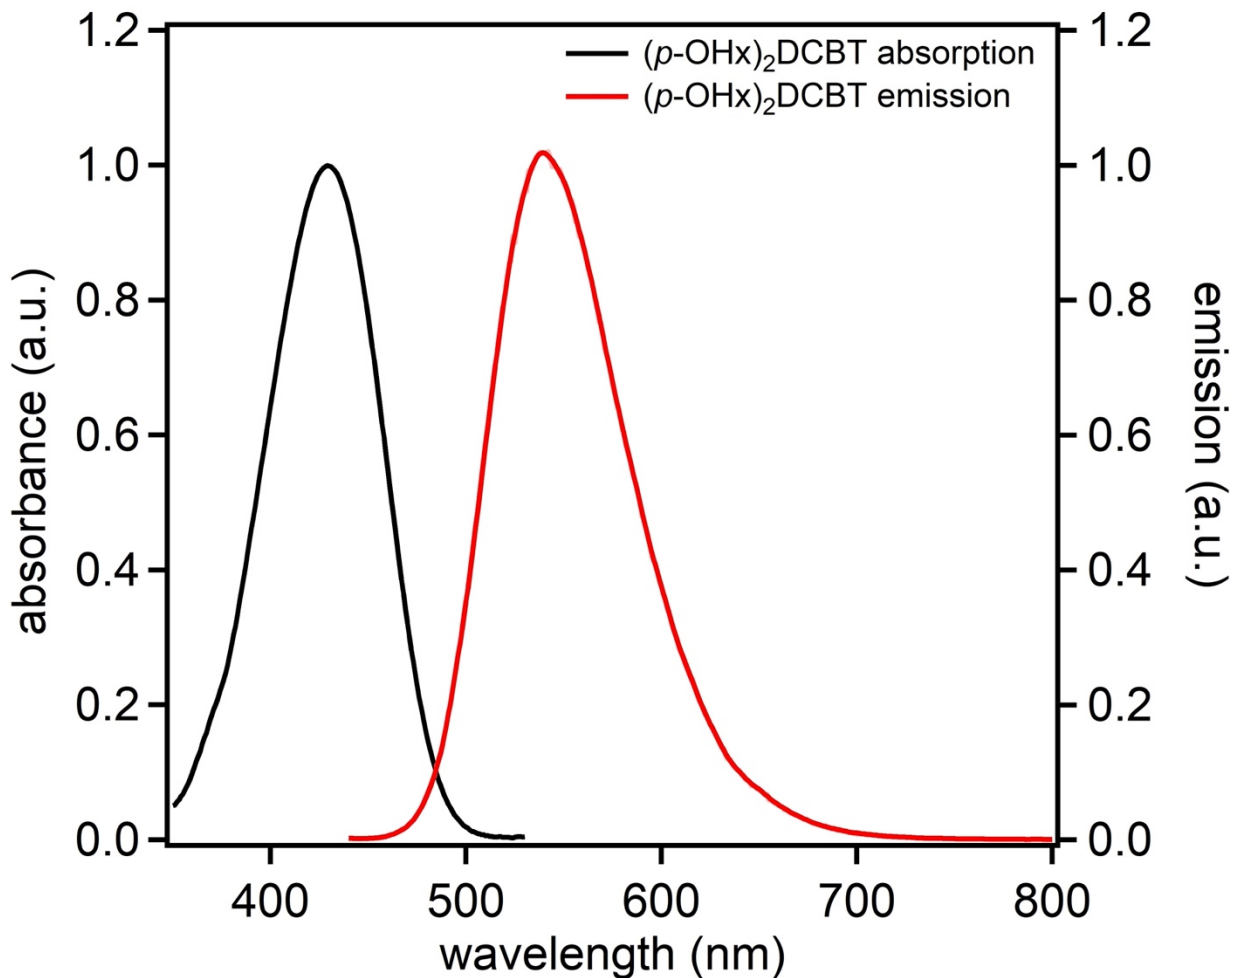

**Figure S11:** Normalized absorption and emission curve plot of  $(p\text{-OHx})_2\text{DCBT}$  in dichloromethane.



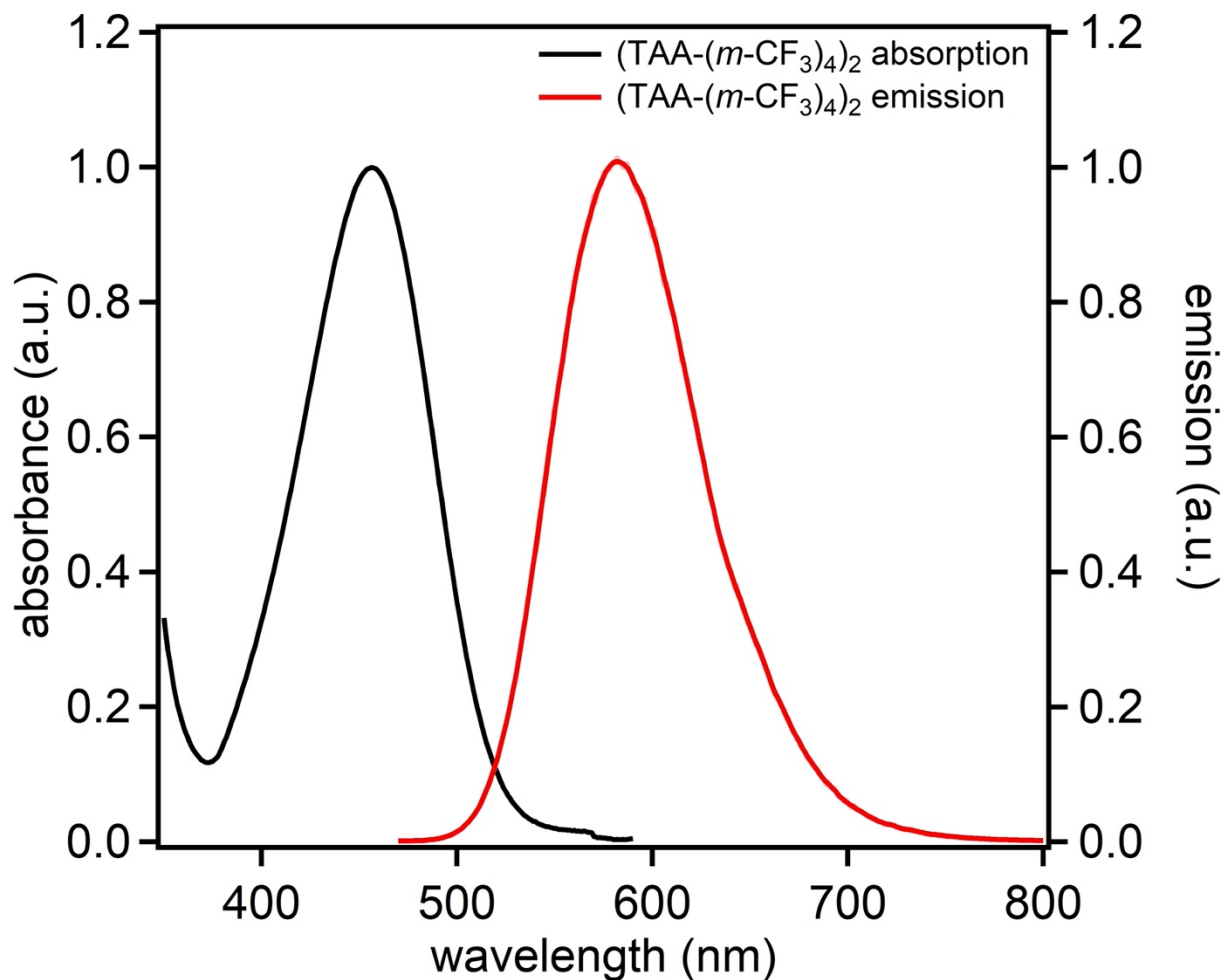

**Figure S12:** Normalized absorption and emission curve plot of (TAA-(*m*-CF<sub>3</sub>)<sub>4</sub>)<sub>2</sub>DCBT in dichloromethane.

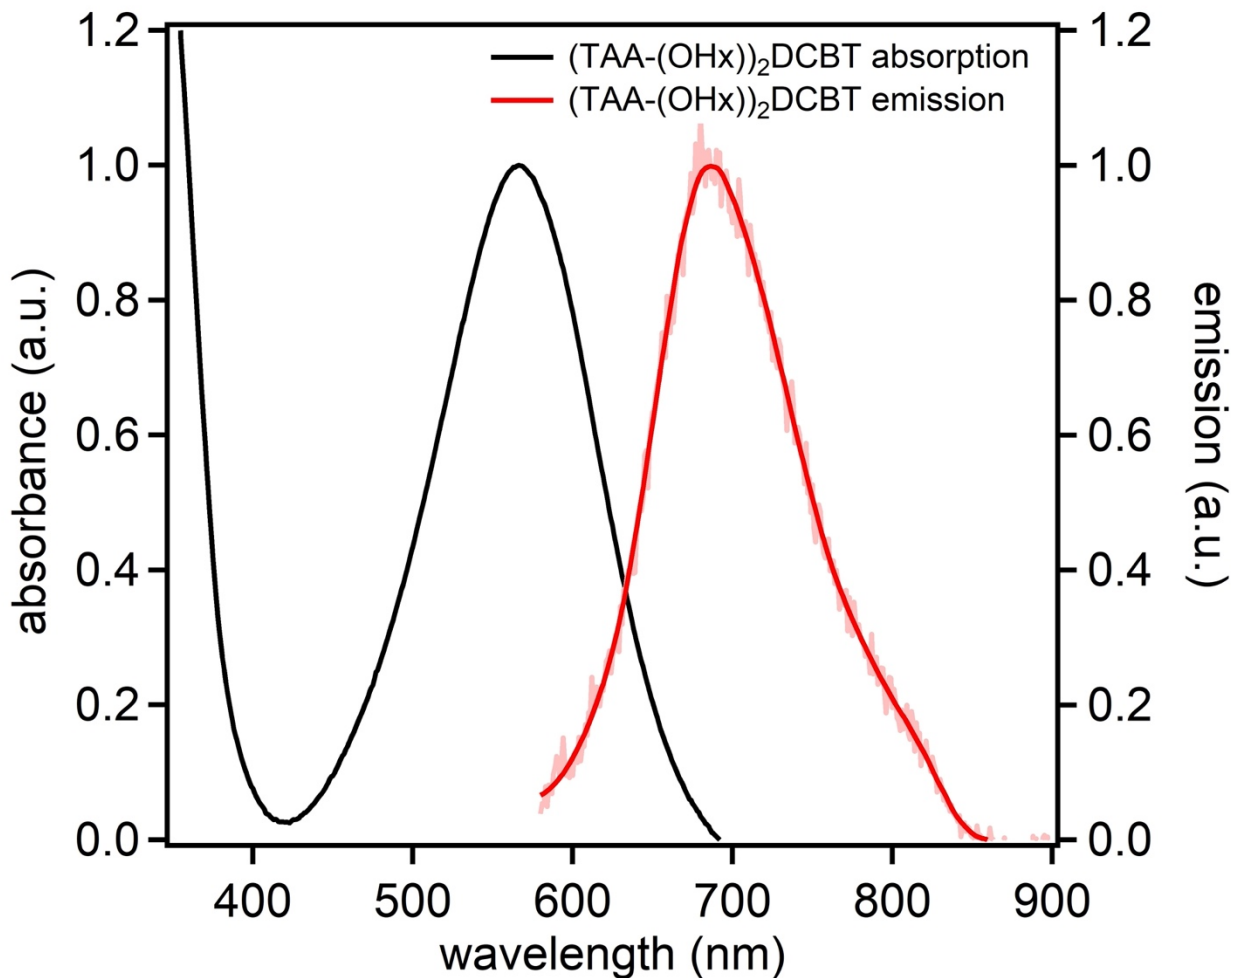

**Figure S13:** Normalized absorption and emission curve plot of (TAA-(OHx)<sub>2</sub>)DCBT in dichloromethane. Raw data is plotted in pink, and a fitted trace is shown in red.

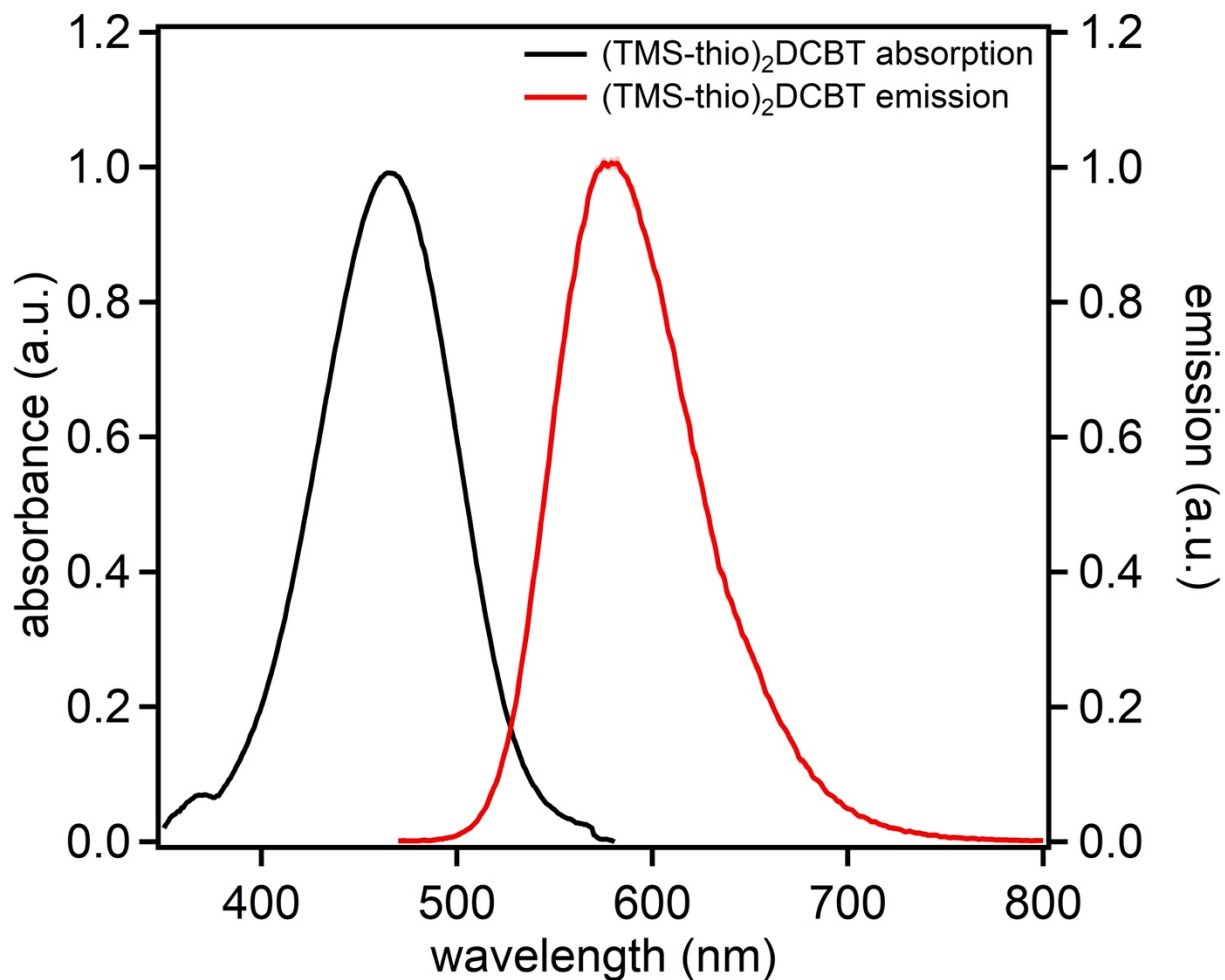

**Figure S14:** Normalized absorption and emission curve plot of (TMS-thio)<sub>2</sub>DCBT in dichloromethane.

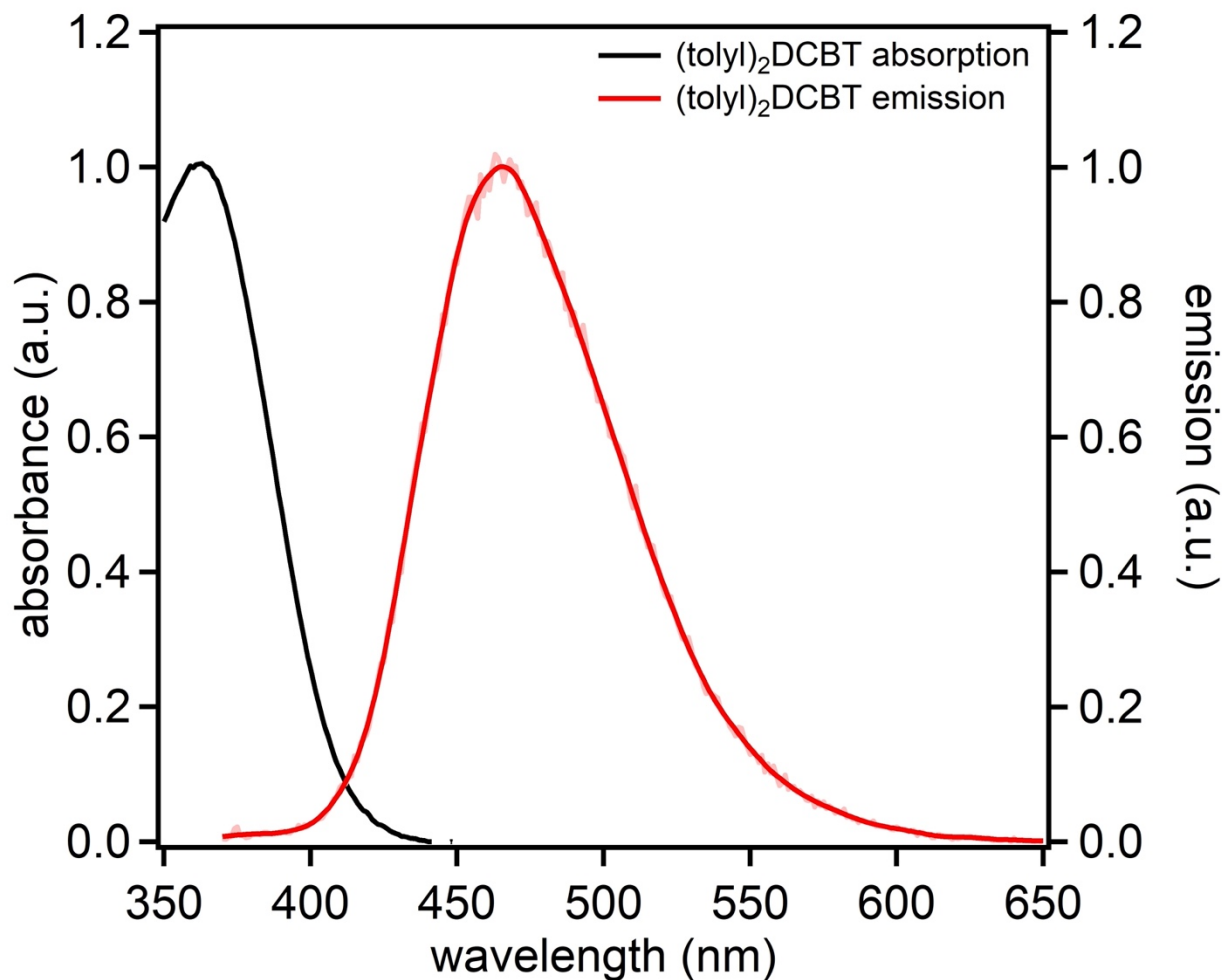

**Figure S15:** Normalized absorption and emission curve plot of (tolyl)<sub>2</sub>DCBT in dichloromethane. Raw data is plotted in pink, and a fitted trace is shown in red.

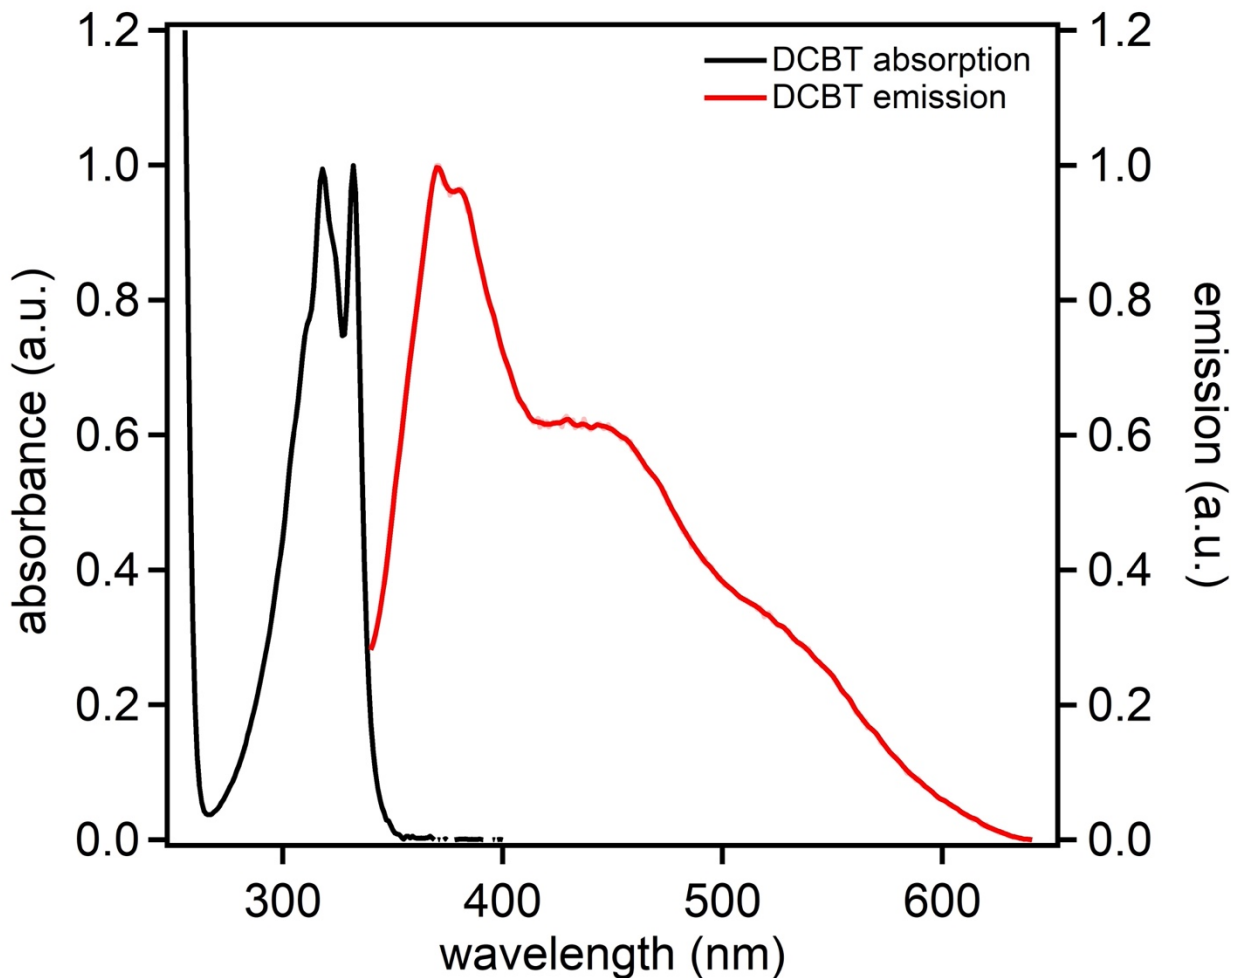

**Figure S16:** Normalized absorption and emission curve plot of DCBT core in dichloromethane.

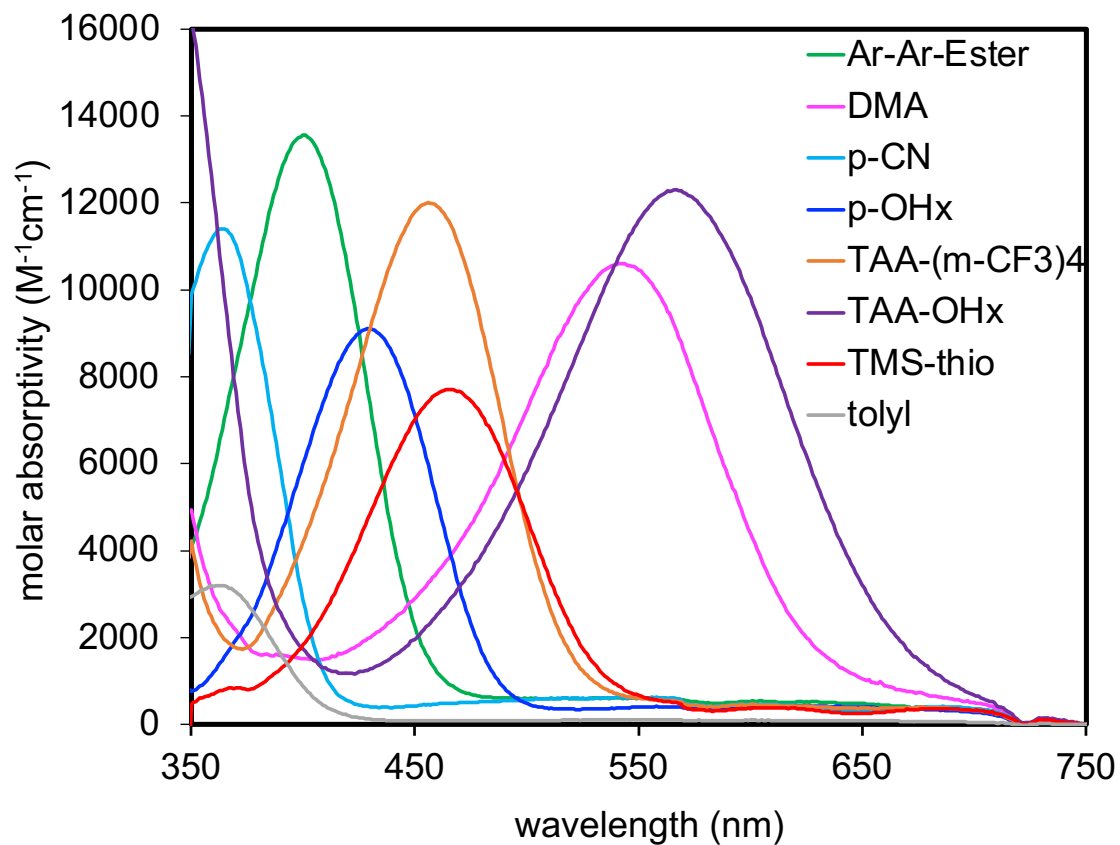

**Figure S17:** Absorption spectra of DCBT dyes in DCM plotted as molar absorptivity coefficients.

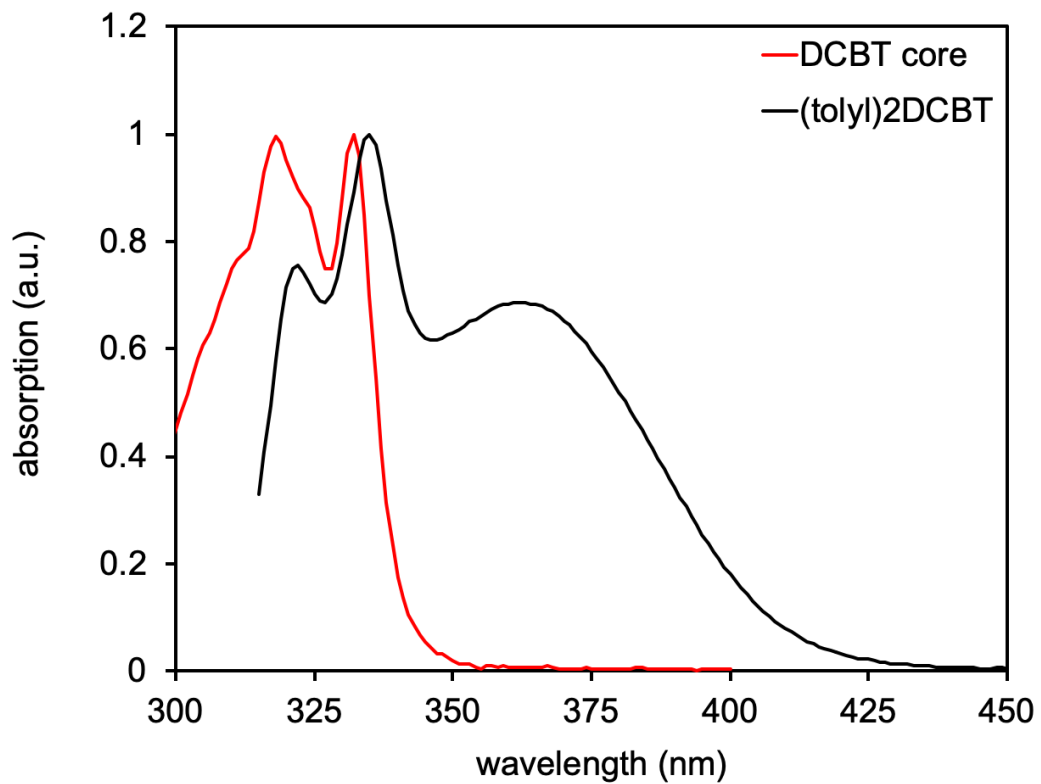

**Figure S18:** Normalized absorption spectra of DCBT core and (tolyl)<sub>2</sub>DCBT in dichloromethane.

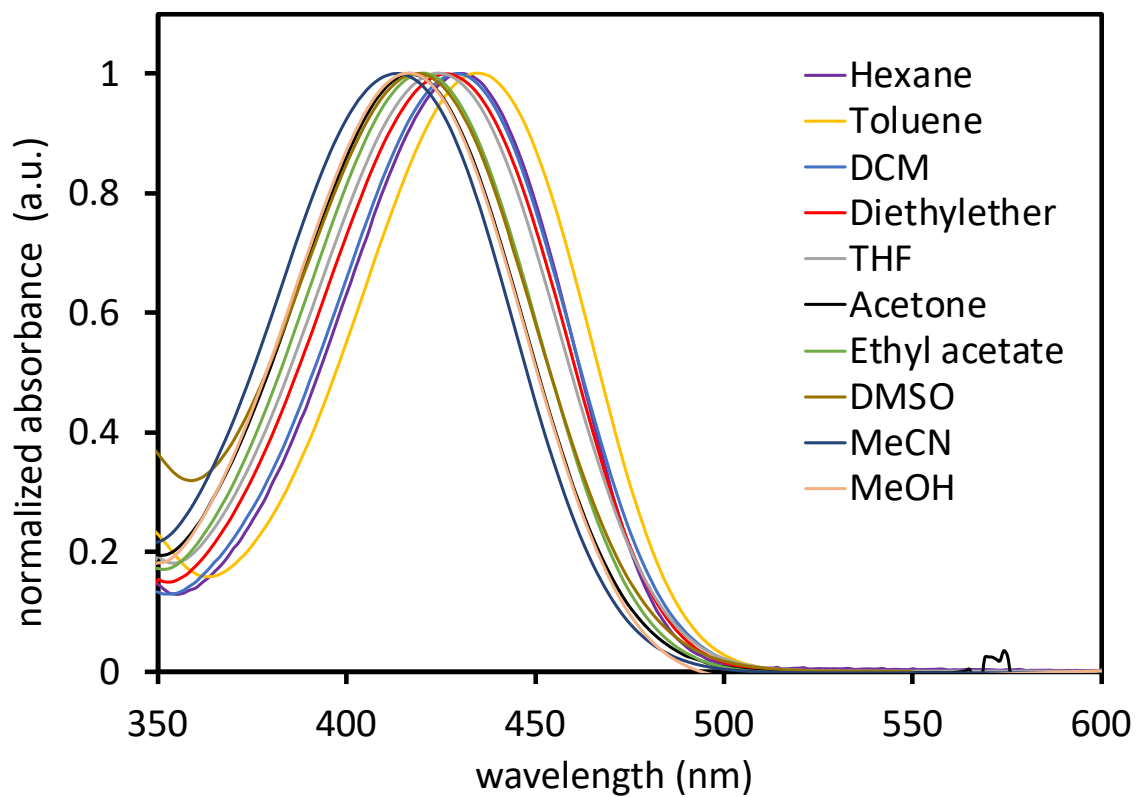

Figure S19: Normalized absorption spectra of  $(p\text{-OHx})_2\text{DCBT}$  in solvents of varying polarity.

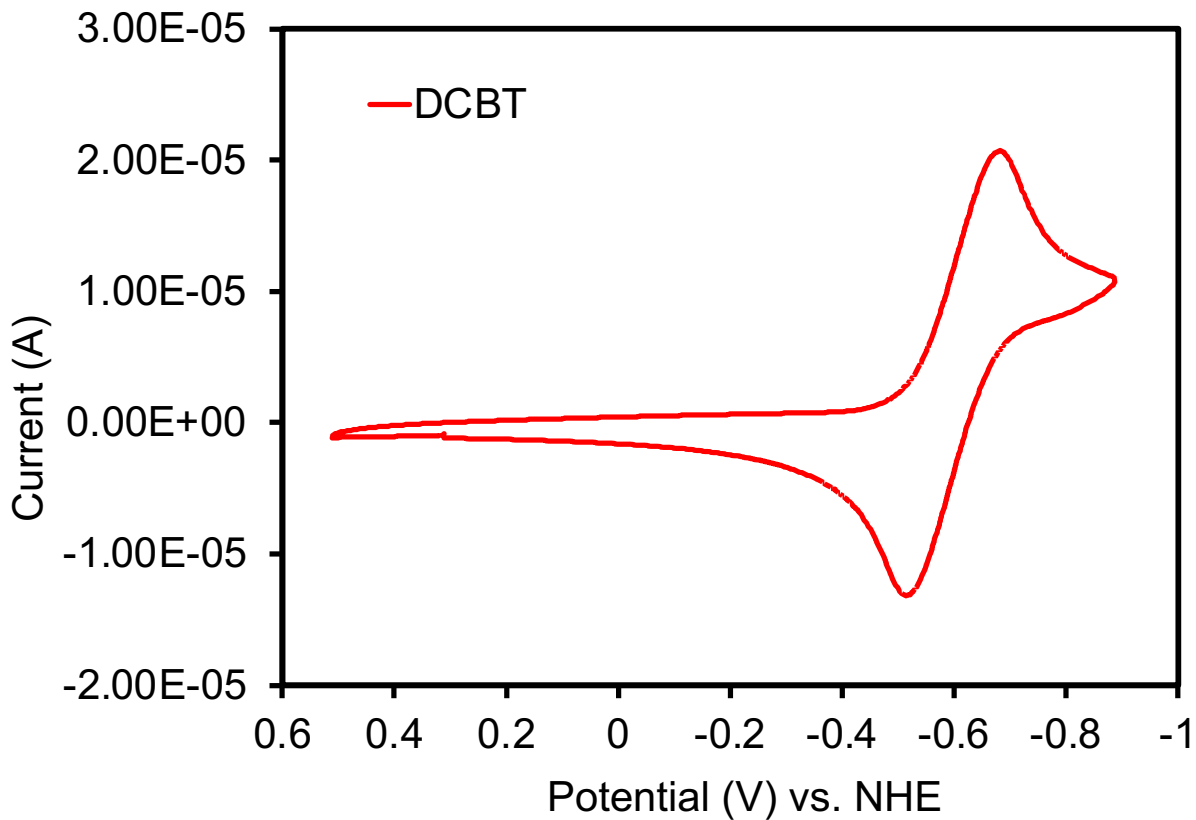



**Figure S20.** Cyclic voltammogram collected for DCBT core in dichloromethane solution with 0.1 M Bu<sub>4</sub>NPF<sub>6</sub> as electrolyte, platinum counter electrode, Ag wire reference electrode and a glassy carbon working electrode. Ferrocenium/Ferrocene was used as a reference standard, taken as 0.70 V versus NHE in DCM and oxidation potentials are reported versus normal hydrogen electrode (NHE).

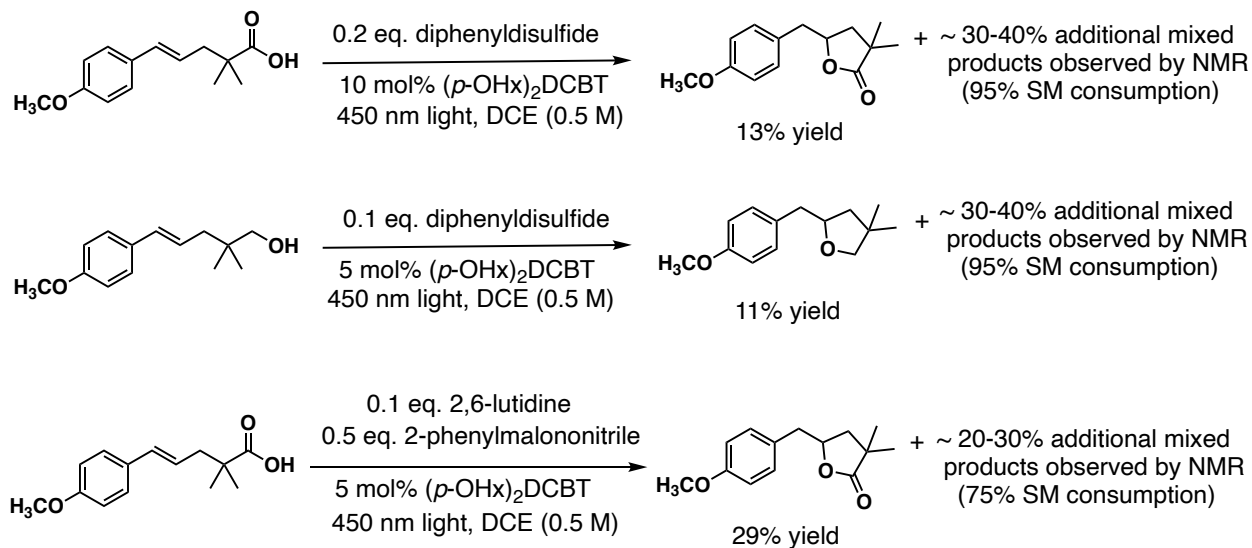

**Figure S21.** Example photochemical transformations driven by (*p*-OHx)<sub>2</sub>DCBT.

### 3. NMR Spectra

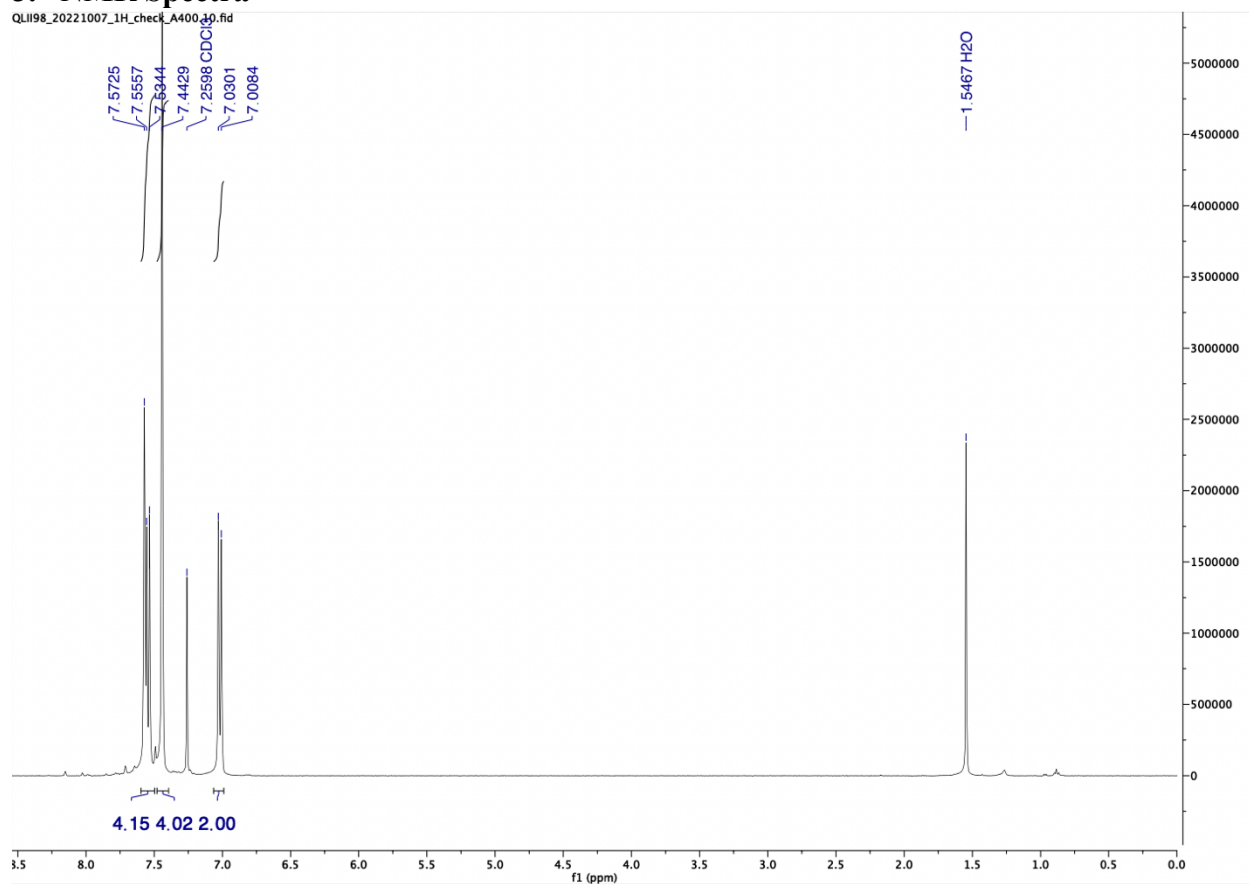

**Figure S22:** <sup>1</sup>H NMR of (TAA-(*m*-CF<sub>3</sub>)<sub>4</sub>)-Br in CDCl<sub>3</sub> at 400 MHz.

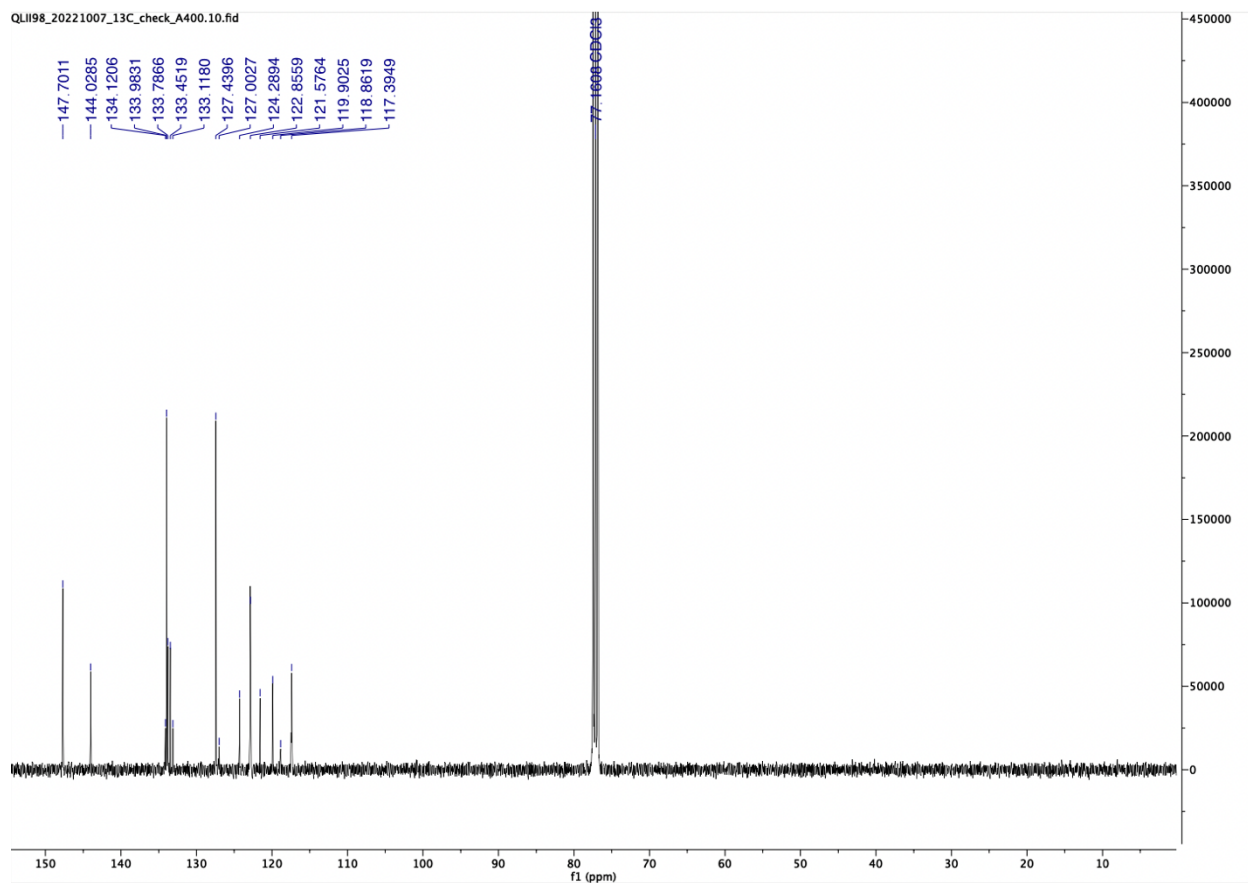

**Figure S23:**  $^{13}\text{C}\{^1\text{H}\}$  NMR of  $(\text{TAA-}(m\text{-CF}_3)_4)_2\text{-Br}$  in  $\text{CDCl}_3$  at 100 MHz.

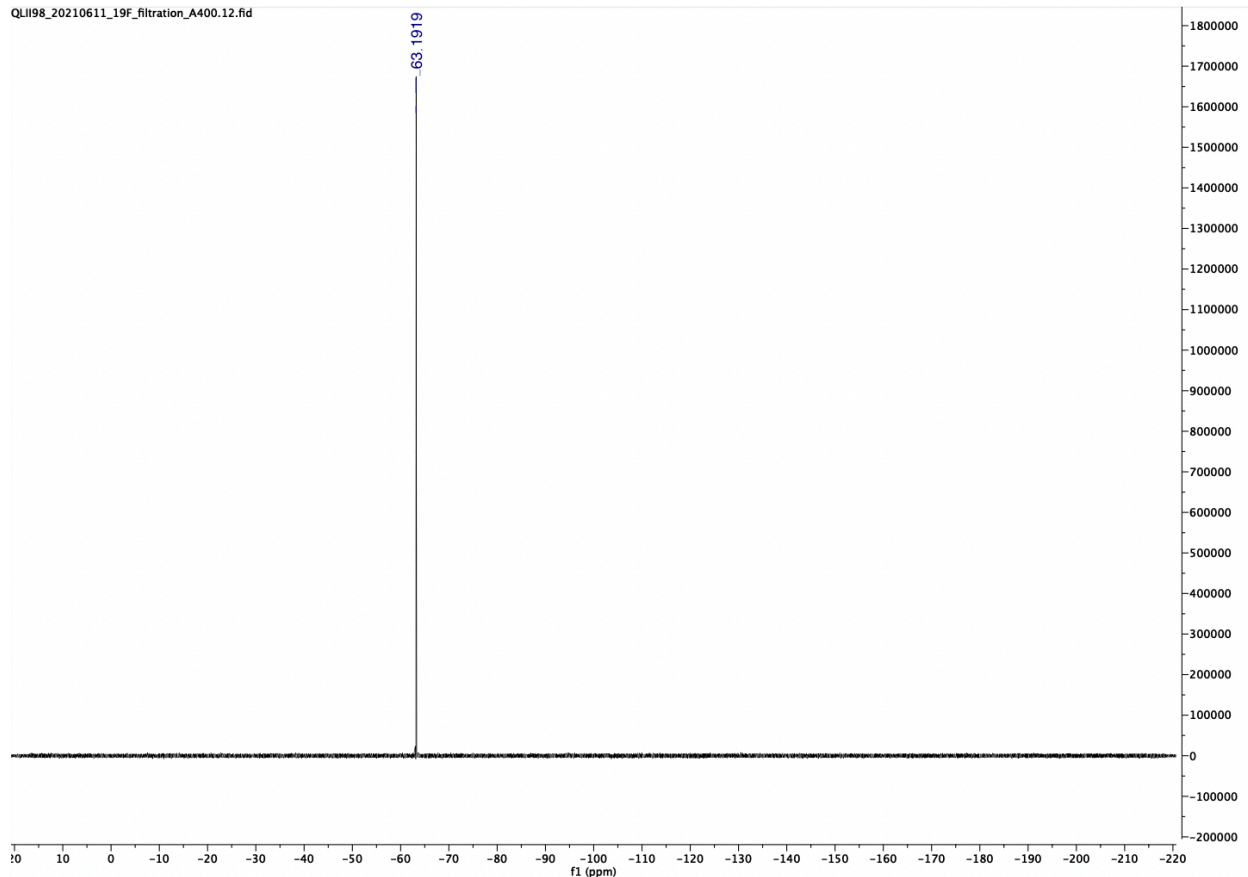

**Figure S24:**  $^{19}\text{F}$  NMR of  $(\text{TAA}-(m\text{-CF}_3)_4)_2\text{-Br}$  in  $\text{CDCl}_3$  at 376 MHz.

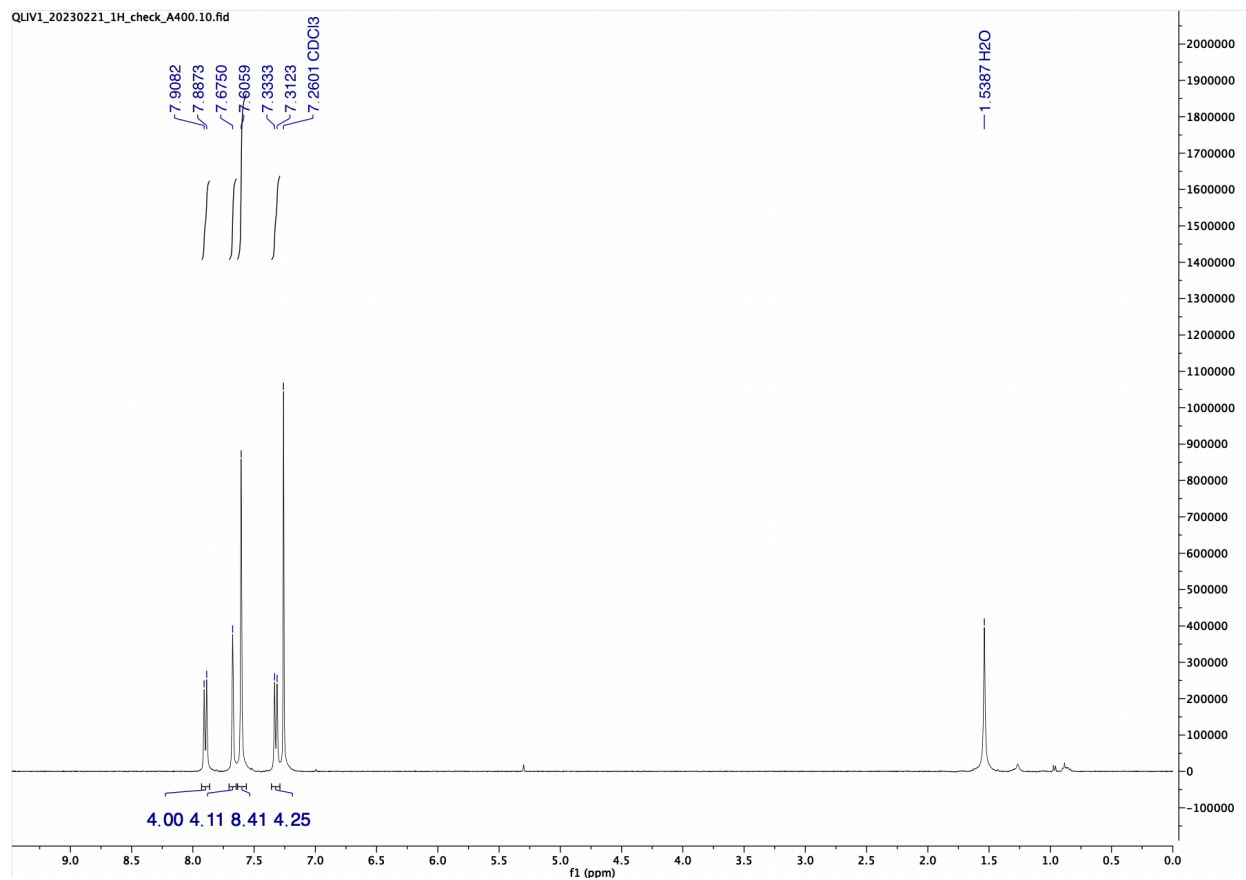

**Figure S25:**  $^1\text{H}$  NMR of  $(\text{TAA}-(m\text{-CF}_3)_4)_2\text{DCBT}$  in  $\text{CDCl}_3$  at 400 MHz.

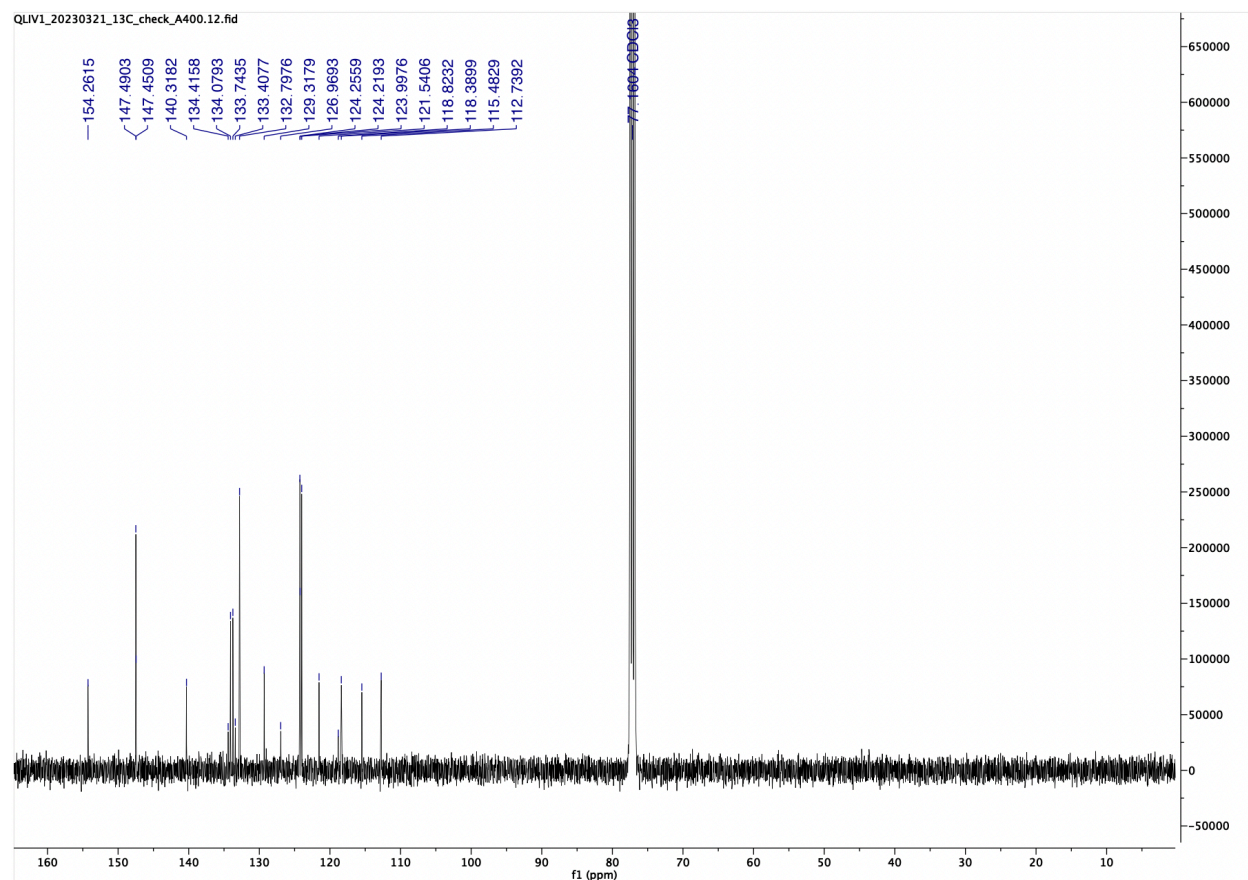

**Figure S26:**  $^{13}\text{C}\{^1\text{H}\}$  NMR of  $(\text{TAA-}(m\text{-CF}_3)_4)_2\text{DCBT}$  in  $\text{CDCl}_3$  at 100 MHz.

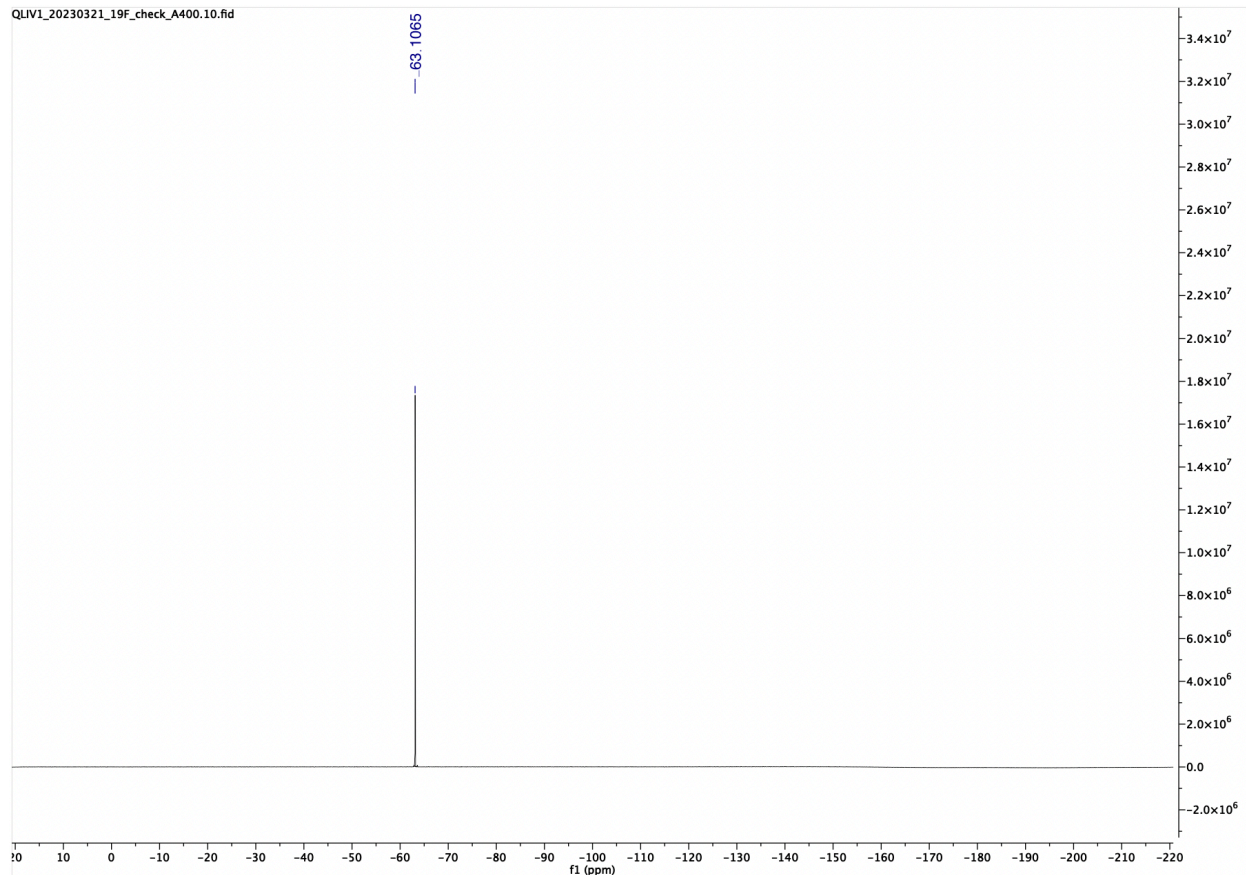

**Figure S27:**  $^{19}\text{F}$  NMR of  $(\text{TAA}-(m\text{-CF}_3)_4)_2\text{DCBT}$  in  $\text{CDCl}_3$  at 376 MHz.

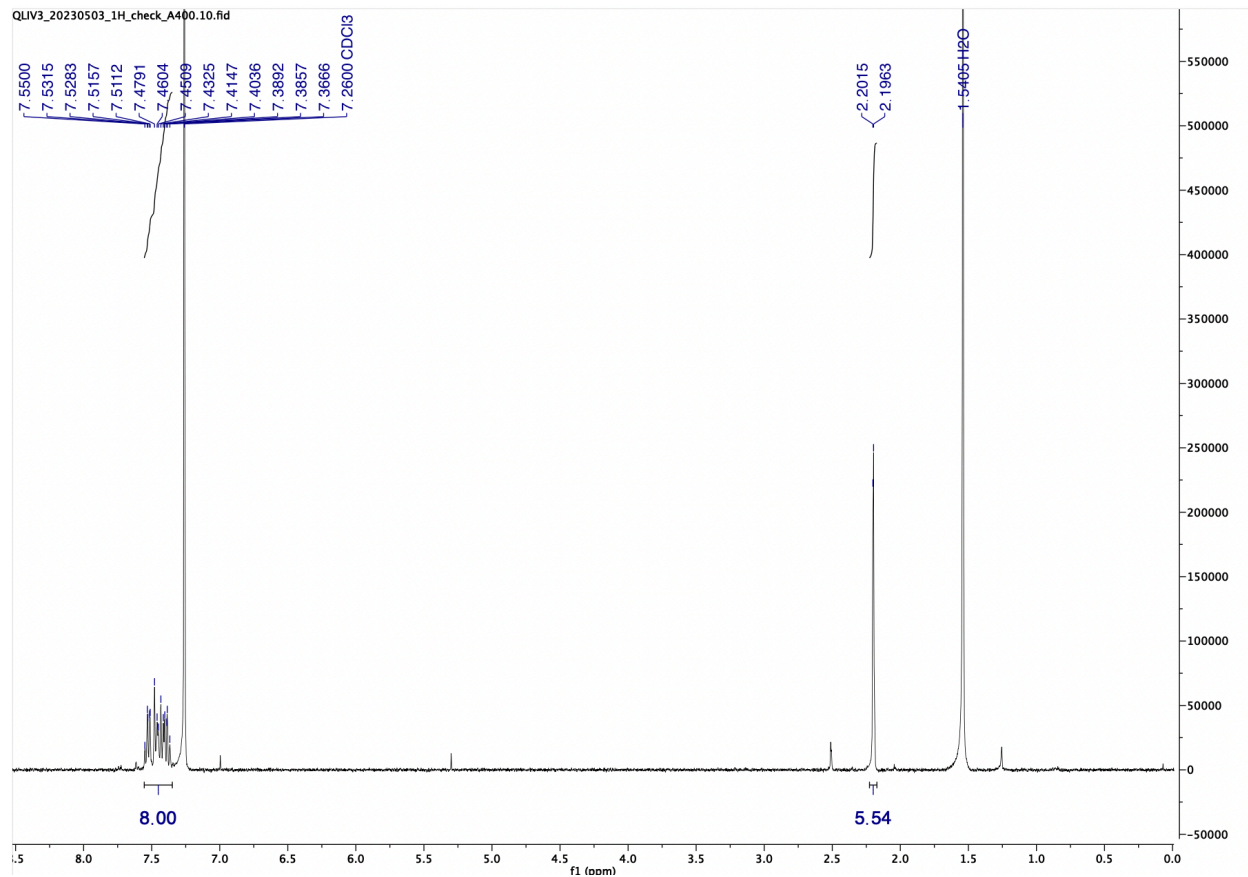

**Figure S28:**  $^1\text{H}$  NMR of (tolyl) $_2$ DCBT in  $\text{CDCl}_3$  at 400 MHz.



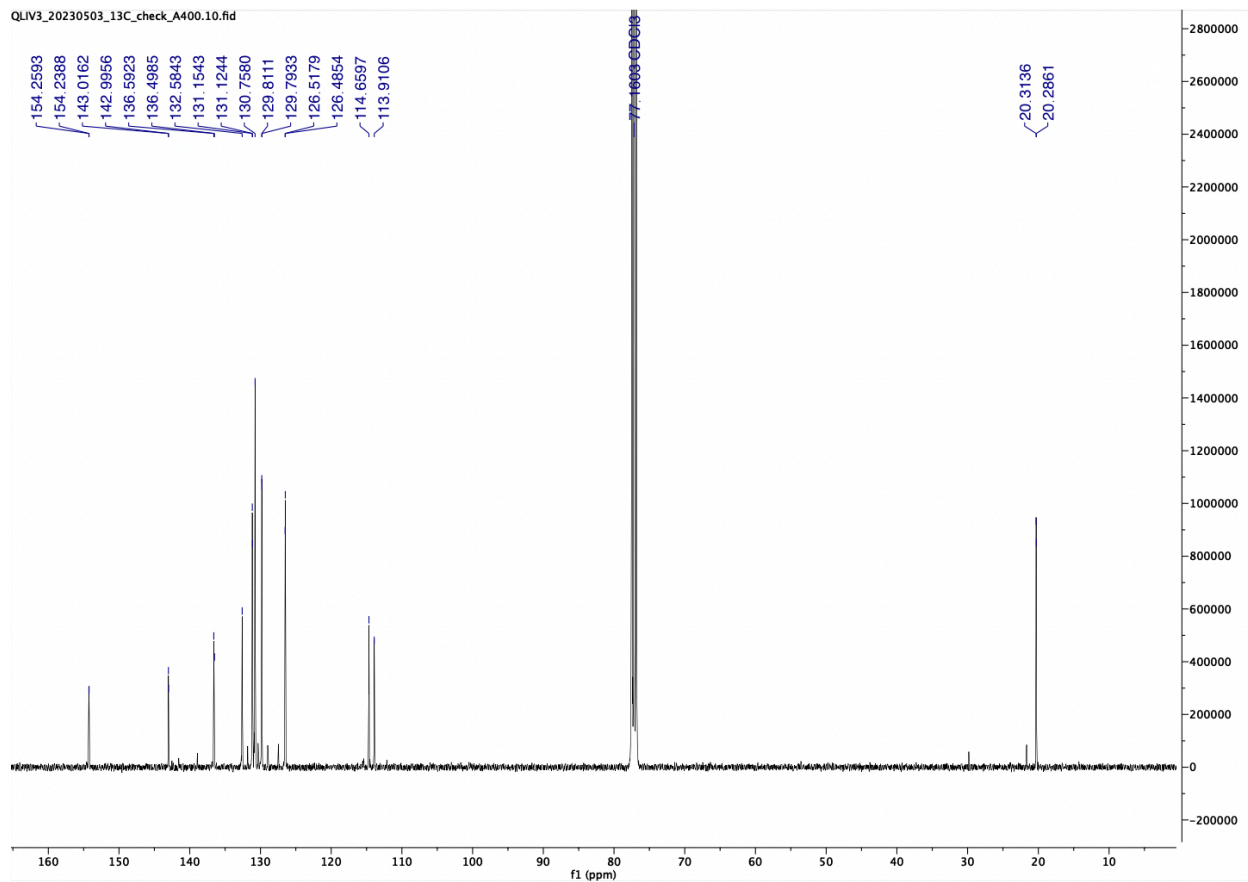

**Figure S29:**  $^{13}\text{C}\{^1\text{H}\}$  NMR of  $(\text{tolyl})_2\text{DCBT}$  in  $\text{CDCl}_3$  at 100 MHz.

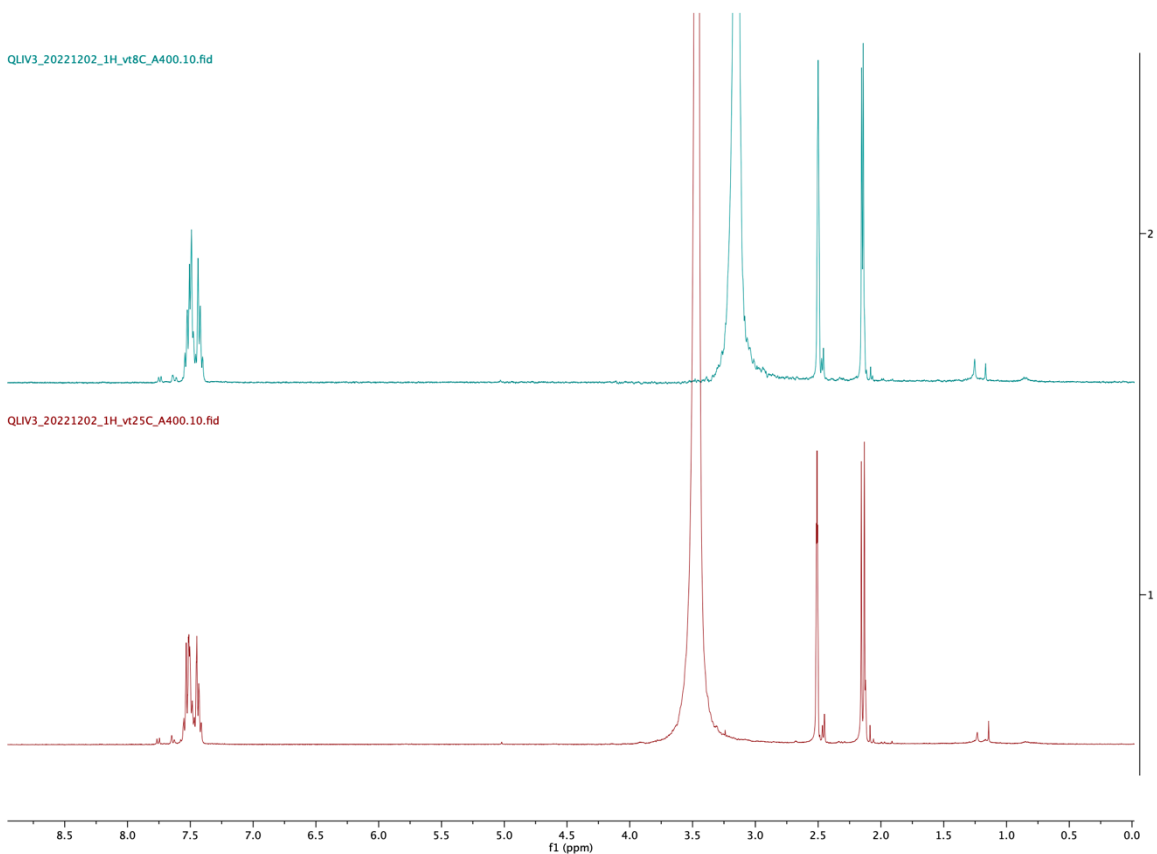

**Figure S30:** Variable temperature <sup>1</sup>H NMR of (tolyl)<sub>2</sub>DCBT at 80°C (top, blue) and 25°C (bottom, red) in (CD<sub>3</sub>)<sub>2</sub>SO at 400 MHz.

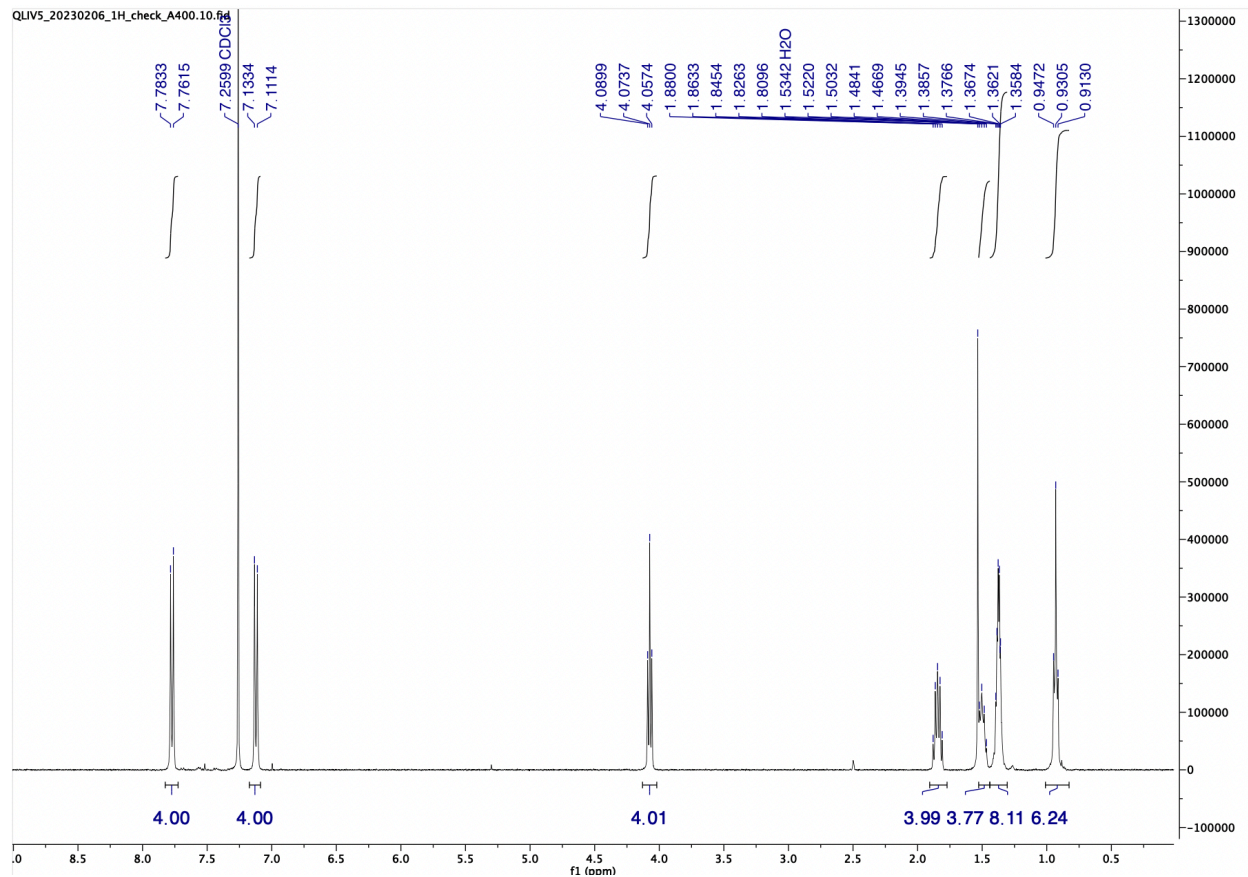

**Figure S31:** <sup>1</sup>H NMR of (*p*-OH<sub>x</sub>)<sub>2</sub>DCBT in CDCl<sub>3</sub> at 400 MHz.

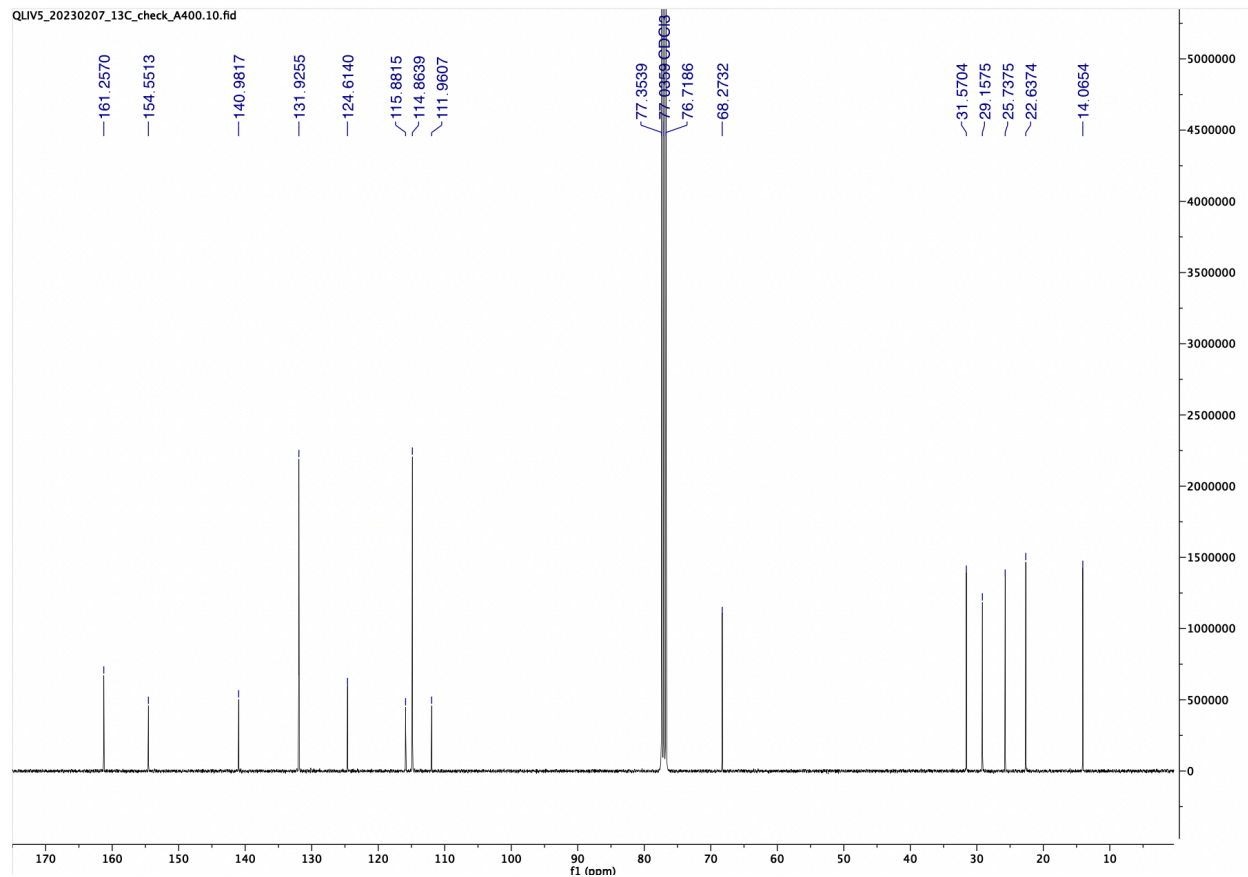

**Figure S32:**  $^{13}\text{C}\{^1\text{H}\}$  NMR of  $(p\text{-OHx})_2\text{DCBT}$  in  $\text{CDCl}_3$  at 100 MHz.

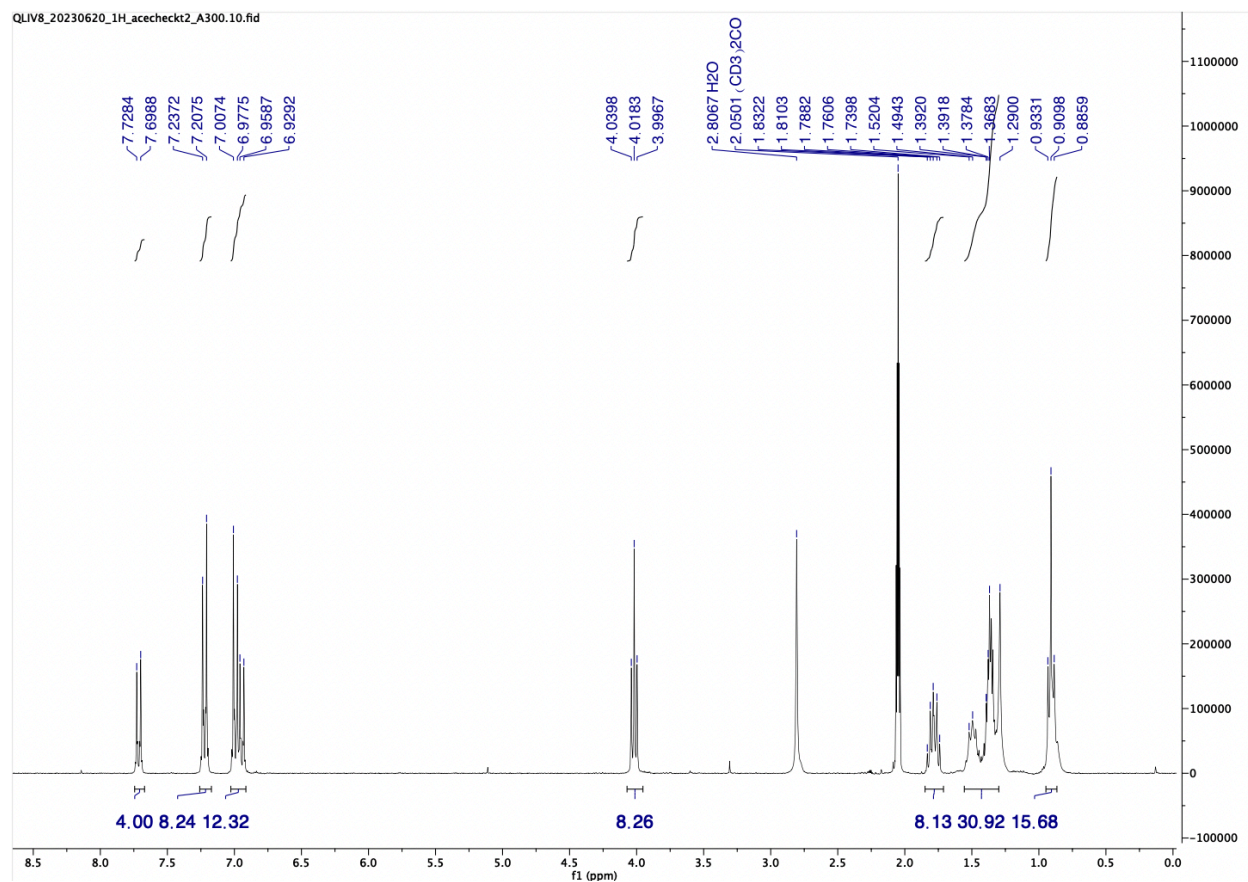

**Figure S33:**  $^1\text{H}$  NMR of  $(\text{TAA}-(\text{OH}_x)_2)\text{DCBT}$  in  $(\text{CD}_3)_2\text{CO}$  at 300 MHz.

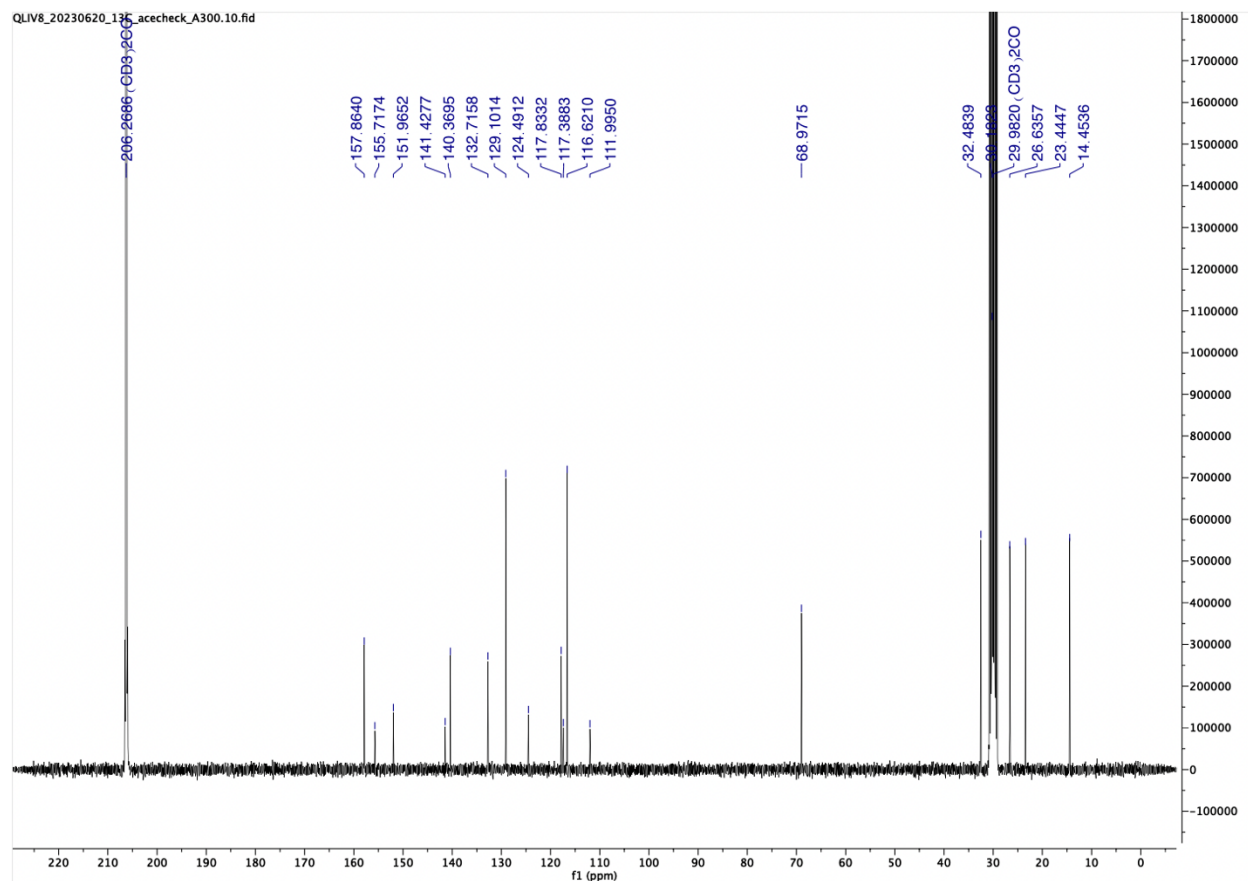

**Figure S34:**  $^{13}\text{C}\{^1\text{H}\}$  NMR of (TAA-(OHx)<sub>2</sub>)DCBT in (CD<sub>3</sub>)<sub>2</sub>CO at 75 MHz.

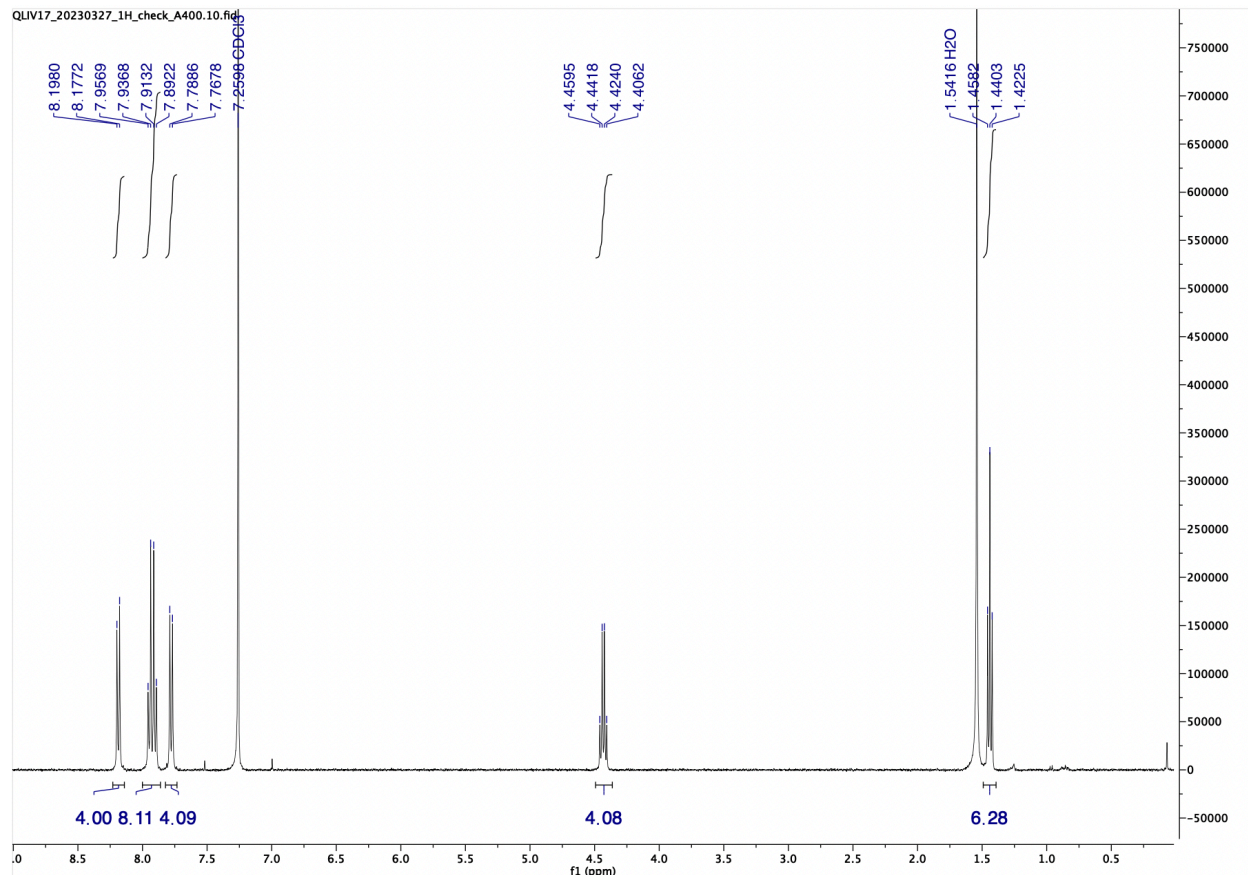

**Figure S35:**  $^1\text{H}$  NMR of  $(\text{Ar-Ar-Ester})_2\text{DCBT}$  in  $\text{CDCl}_3$  at 400 MHz.

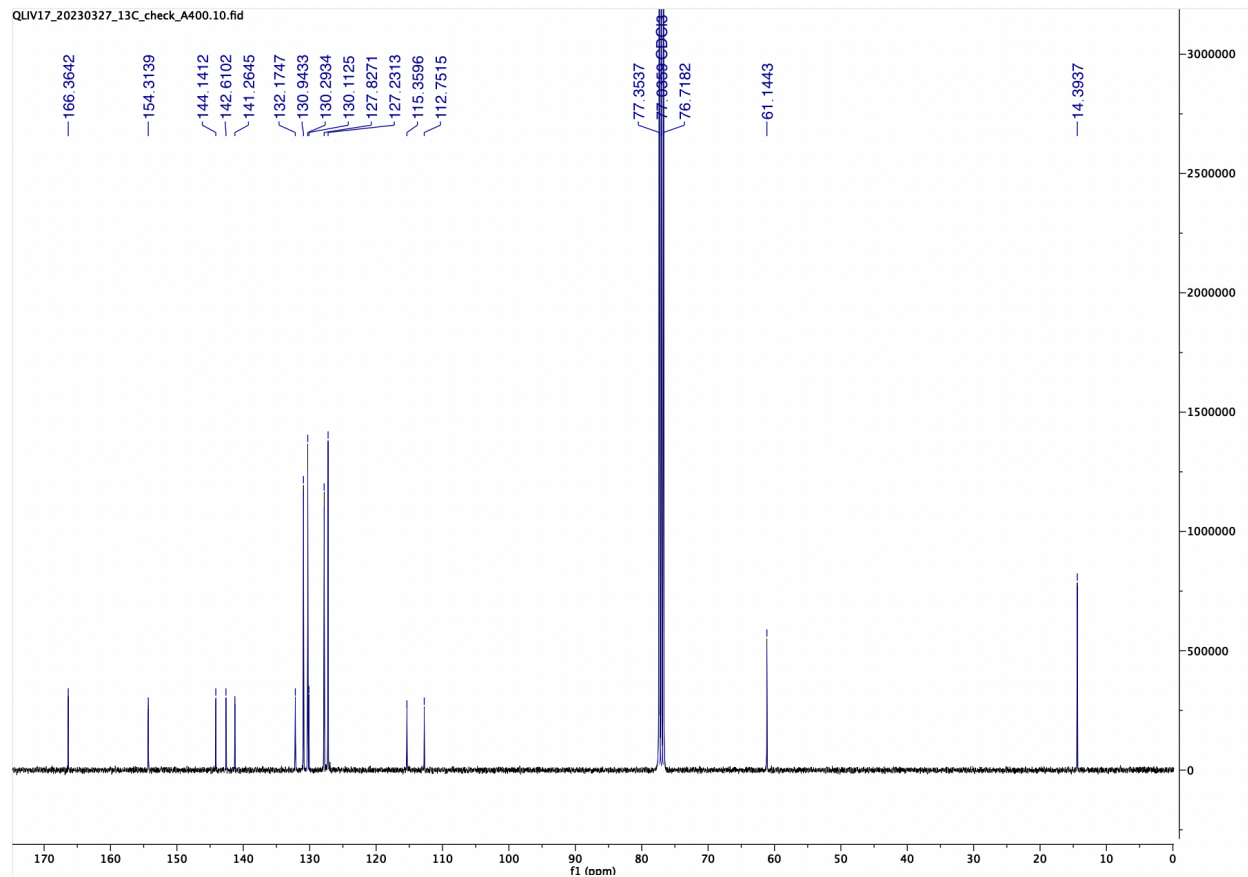

**Figure S36:**  $^{13}\text{C}\{^1\text{H}\}$  NMR of  $(\text{Ar-Ar-Ester})_2\text{DCBT}$  in  $\text{CDCl}_3$  at 100 MHz.



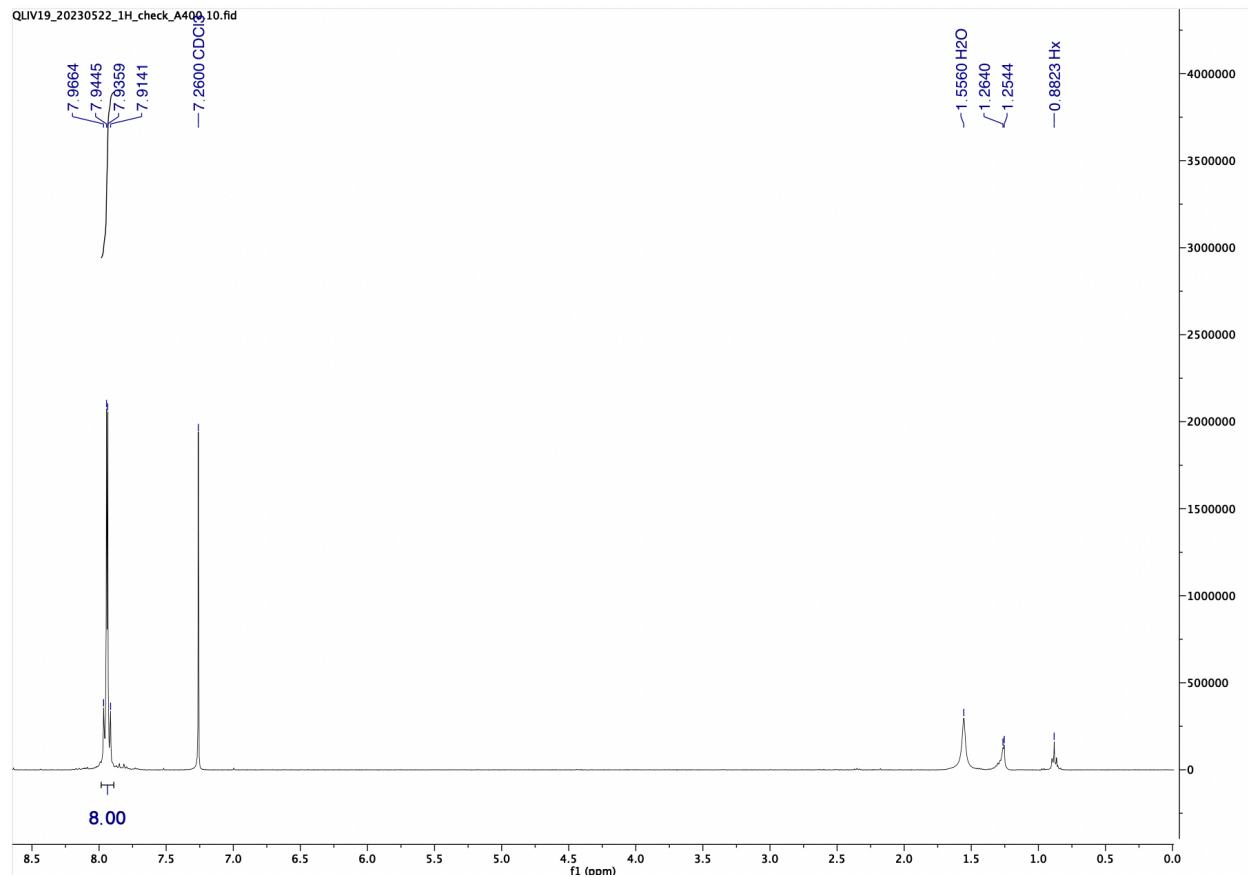

**Figure S37:**  $^1\text{H}$  NMR of  $(p\text{-CN})_2\text{DCBT}$  in  $\text{CDCl}_3$  at 400 MHz.

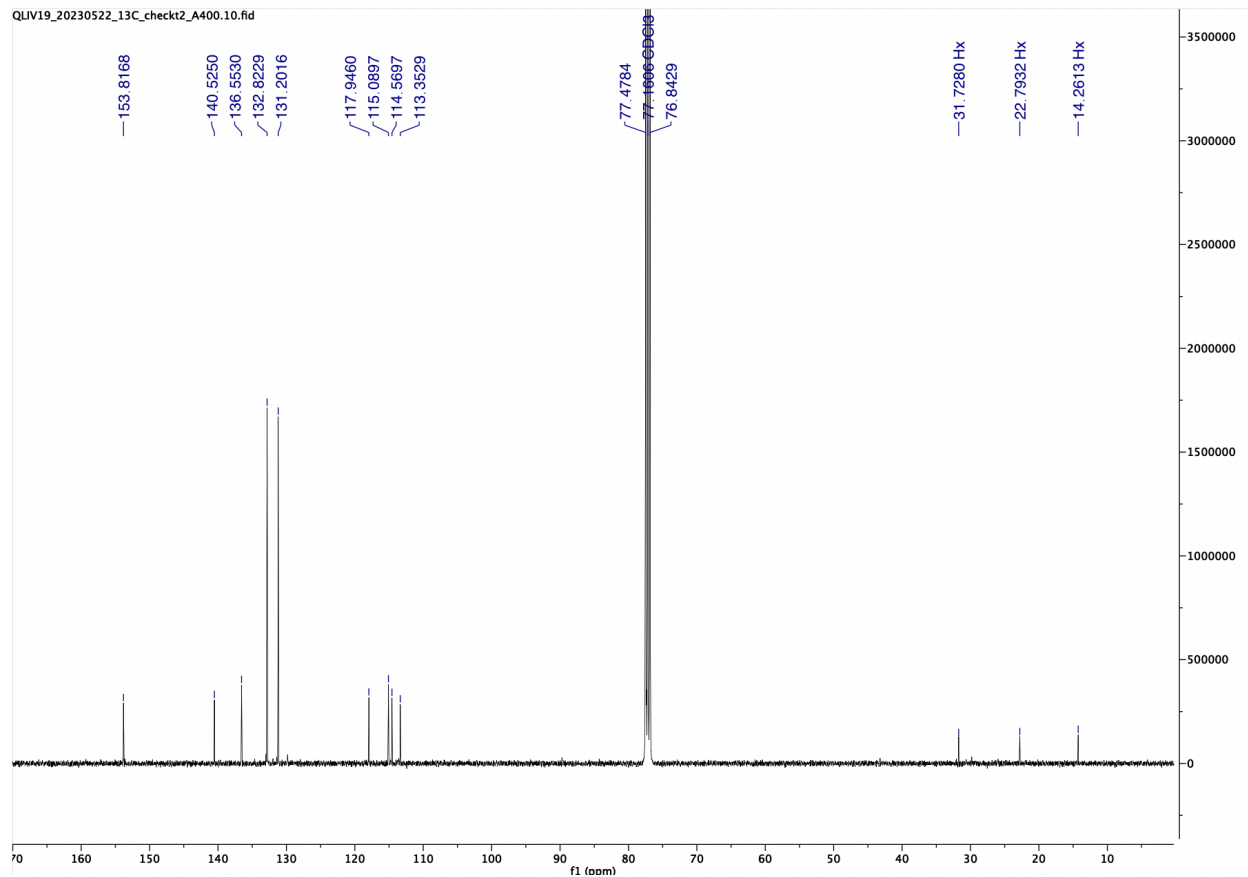

**Figure S38:**  $^{13}\text{C}\{^1\text{H}\}$  NMR of  $(p\text{-CN})_2\text{DCBT}$  in  $\text{CDCl}_3$  at 100 MHz.

#### 4. XYZ coordinates, Frequency, and Total Energy Information

(Ar-Ar-Ester)<sub>2</sub>DCBT Ground State XYZ from DFT Geometry Optimization

Energy = -2302.8941114 Hartrees

No imaginary frequencies were observed

XYZ coordinates

|   |           |          |          |
|---|-----------|----------|----------|
| N | -1.23925  | 2.42184  | -0.00062 |
| C | -0.71987  | 1.19799  | 0.00327  |
| C | 0.71987   | 1.19799  | -0.00329 |
| N | 1.23925   | 2.42183  | 0.00061  |
| S | 0.00001   | 3.46163  | -0.00003 |
| C | -1.47186  | -0.02483 | 0.00293  |
| C | -0.72519  | -1.17972 | 0.0076   |
| C | 0.72518   | -1.17972 | -0.0076  |
| C | 1.47186   | -0.02484 | -0.00293 |
| C | -2.94907  | -0.00066 | -0.00723 |
| C | 2.94907   | -0.00067 | 0.00723  |
| C | -3.64767  | 0.82959  | 0.87434  |
| C | -5.03284  | 0.83841  | 0.87893  |
| C | -5.75861  | 0.03335  | -0.00417 |
| C | -5.05551  | -0.78197 | -0.89462 |
| C | -3.66987  | -0.80167 | -0.89621 |
| C | 3.66987   | -0.80165 | 0.89624  |
| C | 5.05551   | -0.78195 | 0.89464  |
| C | 5.75861   | 0.03334  | 0.00417  |
| C | 5.03284   | 0.83838  | -0.87895 |
| C | 3.64767   | 0.82956  | -0.87436 |
| C | -7.24028  | 0.04513  | 0.0033   |
| C | 7.24028   | 0.04513  | -0.0033  |
| C | 7.94253   | 1.24451  | -0.16407 |
| C | 9.32789   | 1.25416  | -0.17128 |
| C | 10.03438  | 0.06273  | -0.02008 |
| C | 9.34682   | -1.13892 | 0.13972  |
| C | 7.95993   | -1.14426 | 0.14864  |
| C | -7.95993  | -1.14427 | -0.14861 |
| C | -9.34682  | -1.13892 | -0.13969 |
| C | -10.03438 | 0.06273  | 0.02008  |
| C | -9.32789  | 1.25416  | 0.17125  |
| C | -7.94253  | 1.24452  | 0.16404  |
| C | -11.52314 | 0.13011  | 0.03695  |
| O | -12.09183 | -1.07401 | -0.11762 |
| O | -12.15454 | 1.14391  | 0.1732   |
| C | 11.52314  | 0.13011  | -0.03695 |
| O | 12.15454  | 1.1439   | -0.17322 |
| O | 12.09183  | -1.07401 | 0.11765  |
| C | 13.52     | -1.07314 | 0.10853  |

|   |           |          |          |
|---|-----------|----------|----------|
| C | -13.51999 | -1.07314 | -0.1085  |
| C | -1.37686  | -2.45937 | 0.06173  |
| N | -1.87758  | -3.49296 | 0.1114   |
| C | 1.37685   | -2.45938 | -0.06172 |
| N | 1.87755   | -3.49297 | -0.11139 |
| H | -3.10277  | 1.45462  | 1.56984  |
| H | -5.56126  | 1.45801  | 1.59396  |
| H | -5.599    | -1.38783 | -1.60988 |
| H | -3.14548  | -1.42929 | -1.60649 |
| H | 3.14548   | -1.42925 | 1.60653  |
| H | 5.59901   | -1.3878  | 1.60992  |
| H | 5.56126   | 1.45796  | -1.59399 |
| H | 3.10277   | 1.45458  | -1.56988 |
| H | 7.39556   | 2.17555  | -0.25716 |
| H | 9.88367   | 2.17679  | -0.2853  |
| H | 9.90206   | -2.0614  | 0.24735  |
| H | 7.42571   | -2.08218 | 0.24673  |
| H | -7.42571  | -2.08218 | -0.24667 |
| H | -9.90205  | -2.0614  | -0.24729 |
| H | -9.88367  | 2.1768   | 0.28525  |
| H | -7.39556  | 2.17556  | 0.25711  |
| H | 13.81692  | -2.10961 | 0.24165  |
| H | 13.90256  | -0.45403 | 0.92025  |
| H | 13.89146  | -0.6833  | -0.83939 |
| H | -13.89145 | -0.68328 | 0.83941  |
| H | -13.81691 | -2.10962 | -0.24158 |
| H | -13.90256 | -0.45405 | -0.92023 |

(DMA)<sub>2</sub>DCBT Ground State XYZ from DFT Geometry Optimization

Energy = -1653.0329906 Hartrees

No imaginary frequencies were observed

XYZ coordinates

|   |          |          |          |
|---|----------|----------|----------|
| N | -1.23917 | 2.36851  | -0.01257 |
| C | -0.72089 | 1.14524  | -0.00182 |
| C | 0.72091  | 1.14523  | 0.00182  |
| N | 1.23922  | 2.36848  | 0.01257  |
| S | 0.00004  | 3.41071  | -0.00004 |
| C | -1.47972 | -0.07742 | -0.00258 |
| C | -0.72539 | -1.23004 | 0.01005  |
| C | 0.72536  | -1.23005 | -0.01004 |
| C | 1.47972  | -0.07745 | 0.00261  |
| C | -2.95008 | -0.05164 | -0.0249  |
| C | 2.95008  | -0.05168 | 0.02492  |
| C | 3.68004  | -0.89654 | 0.86724  |
| C | 5.06123  | -0.88273 | 0.8867   |
| C | 5.78875  | -0.01495 | 0.0458   |
| C | 5.05046  | 0.83499  | -0.80521 |
| C | 3.66925  | 0.82098  | -0.79972 |
| C | -3.66925 | 0.82104  | 0.79971  |
| C | -5.05047 | 0.83504  | 0.8052   |
| C | -5.78875 | -0.01492 | -0.04579 |
| C | -5.06123 | -0.88273 | -0.88666 |
| C | -3.68004 | -0.89654 | -0.8672  |
| N | -7.16115 | 0.00622  | -0.06002 |
| C | -7.87401 | 0.80829  | 0.91334  |
| C | -7.88246 | -0.99111 | -0.8255  |
| N | 7.16115  | 0.0062   | 0.06003  |
| C | 7.88248  | -0.99108 | 0.82555  |
| C | 7.874    | 0.80826  | -0.91336 |
| C | -1.37143 | -2.51118 | 0.08436  |
| N | -1.86528 | -3.54726 | 0.15549  |
| C | 1.37137  | -2.51121 | -0.08439 |
| N | 1.86516  | -3.54731 | -0.15556 |
| H | 3.15966  | -1.57127 | 1.5363   |
| H | 5.57444  | -1.55302 | 1.56107  |
| H | 5.55766  | 1.511    | -1.47868 |
| H | 3.13667  | 1.48987  | -1.46338 |
| H | -3.13668 | 1.48995  | 1.46337  |
| H | -5.55767 | 1.51106  | 1.47865  |
| H | -5.57443 | -1.55305 | -1.561   |
| H | -3.15965 | -1.57129 | -1.53623 |
| H | -7.62476 | 1.86785  | 0.80634  |
| H | -7.64996 | 0.50404  | 1.94344  |

|   |          |          |          |
|---|----------|----------|----------|
| H | -8.94366 | 0.70026  | 0.74749  |
| H | -7.6546  | -0.90837 | -1.89209 |
| H | -8.951   | -0.83025 | -0.7004  |
| H | -7.6439  | -2.01118 | -0.50062 |
| H | 7.64393  | -2.01116 | 0.50072  |
| H | 7.65461  | -0.90829 | 1.89214  |
| H | 8.95101  | -0.83021 | 0.70045  |
| H | 7.64995  | 0.50398  | -1.94344 |
| H | 8.94365  | 0.70023  | -0.74751 |
| H | 7.62475  | 1.86782  | -0.80637 |

(*p*-CN)<sub>2</sub>DCBT Ground State XYZ from DFT Geometry Optimization

Energy = -1569.6138547 Hartrees

No imaginary frequencies were observed

XYZ coordinates

|   |          |          |          |
|---|----------|----------|----------|
| N | 1.23865  | 2.34188  | -0.00507 |
| C | 0.71924  | 1.11775  | -0.00575 |
| C | -0.71925 | 1.11775  | 0.00572  |
| N | -1.23865 | 2.34187  | 0.00499  |
| S | 0.       | 3.3813   | -0.00005 |
| C | 1.46812  | -0.1053  | -0.0048  |
| C | 0.72485  | -1.26177 | -0.00628 |
| C | -0.72485 | -1.26177 | 0.00631  |
| C | -1.46812 | -0.1053  | 0.0048   |
| C | 2.94735  | -0.07908 | 0.00259  |
| C | -2.94735 | -0.07908 | -0.00259 |
| C | 3.63557  | 0.73982  | -0.8979  |
| C | 5.01968  | 0.76216  | -0.90535 |
| C | 5.72953  | -0.02525 | 0.00362  |
| C | 5.0513   | -0.83601 | 0.91446  |
| C | 3.66619  | -0.86197 | 0.90933  |
| C | -3.6662  | -0.86199 | -0.90931 |
| C | -5.0513  | -0.83603 | -0.91444 |
| C | -5.72953 | -0.02525 | -0.00362 |
| C | -5.01967 | 0.76218  | 0.90533  |
| C | -3.63557 | 0.73984  | 0.89788  |
| C | 1.37938  | -2.53998 | -0.05153 |
| N | 1.88766  | -3.57014 | -0.0907  |
| C | -1.37938 | -2.53998 | 0.0516   |
| N | -1.88765 | -3.57014 | 0.09081  |
| C | -7.16601 | 0.00555  | -0.00371 |
| N | -8.31531 | 0.03394  | -0.00362 |
| C | 7.16601  | 0.00555  | 0.00372  |
| N | 8.31531  | 0.03394  | 0.00362  |
| H | 3.08439  | 1.35338  | -1.59804 |
| H | 5.55665  | 1.38565  | -1.60837 |
| H | 5.60989  | -1.43825 | 1.61901  |
| H | 3.14241  | -1.48641 | 1.62224  |
| H | -3.14242 | -1.48645 | -1.6222  |
| H | -5.6099  | -1.43829 | -1.61897 |
| H | -5.55665 | 1.38569  | 1.60834  |
| H | -3.08439 | 1.35341  | 1.598    |

(*p*-OHx)<sub>2</sub>DCBT Ground State XYZ from DFT Geometry Optimization

Energy = -1614.16766 Hartrees

No imaginary frequencies were observed

XYZ coordinates

|   |          |          |          |
|---|----------|----------|----------|
| N | -1.1543  | -2.39113 | -0.06746 |
| C | -0.67877 | -1.15003 | -0.07411 |
| C | 0.7609   | -1.09907 | -0.06817 |
| N | 1.32255  | -2.3037  | -0.07215 |
| S | 0.12067  | -3.38782 | -0.0692  |
| C | -1.47725 | 0.04472  | -0.07684 |
| C | -0.76862 | 1.22418  | -0.08423 |
| C | 0.68129  | 1.27573  | -0.06133 |
| C | 1.47217  | 0.14986  | -0.06609 |
| C | -2.94971 | -0.03473 | -0.06376 |
| C | 2.9467   | 0.17756  | -0.0761  |
| C | -3.62508 | -0.91419 | -0.92407 |
| C | -5.00225 | -0.97698 | -0.92757 |
| C | -5.74741 | -0.17466 | -0.05603 |
| C | -5.09061 | 0.69053  | 0.81827  |
| C | -3.70249 | 0.75484  | 0.80303  |
| C | 3.64712  | 1.02267  | -0.9489  |
| C | 5.02604  | 1.04832  | -0.95311 |
| C | 5.74737  | 0.23331  | -0.0749  |
| C | 5.06582  | -0.61534 | 0.79807  |
| C | 3.67693  | -0.64316 | 0.78258  |
| O | -7.08924 | -0.31173 | -0.1326  |
| O | 7.09271  | 0.33389  | -0.14909 |
| C | 7.86522  | -0.46738 | 0.72254  |
| C | -7.88486 | 0.49326  | 0.71547  |
| C | -1.46293 | 2.48064  | -0.14812 |
| N | -1.99783 | 3.49676  | -0.20563 |
| C | 1.28471  | 2.5781   | 0.00392  |
| N | 1.74597  | 3.62944  | 0.06569  |
| H | -3.06051 | -1.54216 | -1.60081 |
| H | -5.53661 | -1.63934 | -1.59647 |
| H | -5.63901 | 1.31479  | 1.5095   |
| H | -3.20467 | 1.42522  | 1.49303  |
| H | 3.10483  | 1.65463  | -1.64157 |
| H | 5.57694  | 1.69089  | -1.62762 |
| H | 5.59829  | -1.25509 | 1.4878   |
| H | 3.15679  | -1.30818 | 1.45966  |
| H | 8.9037   | -0.23189 | 0.50399  |
| H | 7.68703  | -1.53191 | 0.54226  |
| H | 7.65056  | -0.23165 | 1.76927  |
| H | -8.9169  | 0.23976  | 0.48683  |



|   |          |         |         |
|---|----------|---------|---------|
| H | -7.71783 | 1.55663 | 0.51978 |
| H | -7.68143 | 0.27764 | 1.76876 |

(TAA-(*m*-CF<sub>3</sub>)<sub>4</sub>)<sub>2</sub>DCBT Ground State XYZ from DFT Geometry Optimization

Energy = -5116.2161653 Hartrees

No imaginary frequencies were observed

XYZ coordinates

|   |          |          |          |
|---|----------|----------|----------|
| N | -1.23913 | -2.14176 | 0.73554  |
| C | -0.71801 | -0.99964 | 0.29766  |
| C | 0.72082  | -0.99395 | 0.31817  |
| N | 1.2383   | -2.13662 | 0.75899  |
| S | -0.00203 | -3.11019 | 1.12079  |
| C | -1.46784 | 0.14066  | -0.14684 |
| C | -0.72035 | 1.21953  | -0.55814 |
| C | 0.72909  | 1.22812  | -0.52974 |
| C | 1.47373  | 0.14951  | -0.1126  |
| C | -2.94374 | 0.11626  | -0.1357  |
| C | 2.95052  | 0.12515  | -0.09603 |
| C | -3.63649 | -0.98165 | -0.65662 |
| C | -5.0198  | -1.00798 | -0.6585  |
| C | -5.74357 | 0.05033  | -0.10299 |
| C | -5.05964 | 1.1424   | 0.43362  |
| C | -3.67502 | 1.1769   | 0.40491  |
| C | 3.68842  | 0.55215  | -1.20307 |
| C | 5.07333  | 0.5375   | -1.18042 |
| C | 5.74957  | 0.0847   | -0.0467  |
| C | 5.01974  | -0.35407 | 1.06032  |
| C | 3.63581  | -0.33457 | 1.03284  |
| N | -7.16009 | 0.0061   | -0.07777 |
| C | -7.81956 | -1.1993  | 0.24707  |
| C | -7.90862 | 1.18139  | -0.31086 |
| N | 7.16774  | 0.06539  | -0.02019 |
| C | 7.88821  | -0.36958 | -1.1532  |
| C | 7.85324  | 0.45613  | 1.15054  |
| C | 9.08446  | 0.25668  | -1.51477 |
| C | 9.78643  | -0.18539 | -2.62492 |
| C | 9.3153   | -1.22999 | -3.41141 |
| C | 8.12114  | -1.83604 | -3.04991 |
| C | 7.4125   | -1.42774 | -1.92825 |
| C | 8.99274  | -0.23311 | 1.5693   |
| C | 9.65931  | 0.16758  | 2.71841  |
| C | 9.20368  | 1.2312   | 3.48494  |
| C | 8.06124  | 1.90095  | 3.06607  |
| C | 7.39222  | 1.53564  | 1.90757  |
| C | -7.51036 | 2.08262  | -1.30376 |
| C | -8.24795 | 3.23401  | -1.52249 |
| C | -9.3969  | 3.51025  | -0.78822 |
| C | -9.78495 | 2.60705  | 0.18812  |

|   |           |          |          |
|---|-----------|----------|----------|
| C | -9.04857  | 1.45658  | 0.44241  |
| C | -9.00871  | -1.55084 | -0.40092 |
| C | -9.64888  | -2.73352 | -0.0711  |
| C | -9.12377  | -3.60153 | 0.88073  |
| C | -7.94021  | -3.24774 | 1.50888  |
| C | -7.29207  | -2.05526 | 1.21304  |
| C | -1.37327  | 2.39129  | -1.07263 |
| N | -1.88291  | 3.3323   | -1.49246 |
| C | 1.3848    | 2.44153  | -0.93178 |
| N | 1.89654   | 3.42001  | -1.25136 |
| C | -11.03989 | 2.83632  | 0.98485  |
| F | -12.0246  | 2.0254   | 0.57762  |
| F | -10.8441  | 2.58696  | 2.28574  |
| F | -11.4823  | 4.09122  | 0.87299  |
| C | -7.78603  | 4.22996  | -2.55189 |
| F | -8.82157  | 4.80054  | -3.17805 |
| F | -7.07758  | 5.21417  | -1.98666 |
| F | -7.01054  | 3.66251  | -3.48048 |
| C | -10.95582 | -3.0874  | -0.72702 |
| F | -11.01946 | -4.39258 | -1.01393 |
| F | -11.98978 | -2.81198 | 0.07694  |
| F | -11.14427 | -2.41081 | -1.86436 |
| C | -7.30572  | -4.17583 | 2.50763  |
| F | -6.29336  | -4.85915 | 1.95578  |
| F | -6.79903  | -3.50481 | 3.54894  |
| F | -8.17616  | -5.07006 | 2.98345  |
| C | 7.54487   | -2.93775 | -3.89605 |
| F | 7.01651   | -3.90982 | -3.14222 |
| F | 6.56253   | -2.47889 | -4.68321 |
| F | 8.46484   | -3.49232 | -4.68963 |
| C | 11.10603  | 0.45412  | -2.9615  |
| F | 12.11828  | -0.18388 | -2.36094 |
| F | 11.34629  | 0.42613  | -4.27621 |
| F | 11.15353  | 1.73038  | -2.56472 |
| C | 7.50316   | 3.02139  | 3.90043  |
| F | 6.9622    | 3.97985  | 3.14124  |
| F | 6.53852   | 2.5778   | 4.7183   |
| F | 8.44162   | 3.5864   | 4.66543  |
| C | 10.91937  | -0.55571 | 3.10829  |
| F | 11.97151  | -0.10201 | 2.41619  |
| F | 11.19991  | -0.40228 | 4.40559  |
| F | 10.82693  | -1.86849 | 2.86353  |
| H | -3.08791  | -1.81112 | -1.08308 |
| H | -5.54723  | -1.85182 | -1.08658 |
| H | -5.61378  | 1.95995  | 0.8785   |
| H | -3.1597   | 2.02631  | 0.83627  |

|   |          |          |          |
|---|----------|----------|----------|
| H | 3.17933  | 0.90147  | -2.09287 |
| H | 5.63452  | 0.87818  | -2.04203 |
| H | 5.54154  | -0.71231 | 1.93952  |
| H | 3.08137  | -0.68391 | 1.89392  |
| H | 9.45984  | 1.08912  | -0.93184 |
| H | 9.86441  | -1.55934 | -4.28343 |
| H | 6.49177  | -1.92928 | -1.65423 |
| H | 9.3544   | -1.08234 | 1.00147  |
| H | 9.72435  | 1.53067  | 4.3846   |
| H | 6.51521  | 2.08621  | 1.588    |
| H | -6.62887 | 1.87856  | -1.89939 |
| H | -9.97363 | 4.4059   | -0.97779 |
| H | -9.36098 | 0.77633  | 1.22634  |
| H | -9.42559 | -0.90102 | -1.1605  |
| H | -9.62569 | -4.52946 | 1.12198  |
| H | -6.37737 | -1.79135 | 1.73068  |

(TAA-(OHx))<sub>2</sub>DCBT Ground State XYZ from DFT Geometry Optimization

Energy = -2877.9147101 Hartrees

No imaginary frequencies were observed

XYZ coordinates

|   |          |          |          |
|---|----------|----------|----------|
| N | 1.22083  | -2.39289 | -0.07656 |
| C | 0.71297  | -1.16508 | -0.06658 |
| C | -0.72835 | -1.1521  | -0.06531 |
| N | -1.25783 | -2.37079 | -0.05612 |
| S | -0.02767 | -3.4235  | -0.06667 |
| C | 1.48062  | 0.05083  | -0.06676 |
| C | 0.73876  | 1.21121  | -0.05361 |
| C | -0.71144 | 1.22447  | -0.07289 |
| C | -1.47416 | 0.07761  | -0.06414 |
| C | 2.95142  | 0.01411  | -0.08835 |
| C | -2.94553 | 0.06641  | -0.04766 |
| C | 3.66134  | -0.85159 | 0.75148  |
| C | 5.04369  | -0.86601 | 0.76021  |
| C | 5.77306  | -0.02968 | -0.09973 |
| C | 5.06334  | 0.81743  | -0.96519 |
| C | 3.68202  | 0.84205  | -0.94805 |
| C | -3.6662  | 0.90569  | 0.80838  |
| C | -5.0486  | 0.90223  | 0.82089  |
| C | -5.76784 | 0.06551  | -0.04612 |
| C | -5.04784 | -0.7815  | -0.90428 |
| C | -3.66623 | -0.78787 | -0.89122 |
| N | 7.17009  | -0.04098 | -0.09933 |
| C | 7.89129  | -1.18965 | 0.32814  |
| C | 7.9104   | 1.11587  | -0.47216 |
| N | -7.16471 | 0.07486  | -0.0561  |
| C | -7.89177 | 1.22736  | 0.35354  |
| C | -7.90128 | -1.07591 | -0.4514  |
| C | -7.55191 | 2.49525  | -0.13292 |
| C | -8.26797 | 3.6094   | 0.25818  |
| C | -9.3579  | 3.48259  | 1.12529  |
| C | -9.713   | 2.22232  | 1.6003   |
| C | -8.97152 | 1.10614  | 1.21921  |
| C | -8.96112 | -0.95365 | -1.35621 |
| C | -9.69666 | -2.06228 | -1.72761 |
| C | -9.38018 | -3.32486 | -1.21739 |
| C | -8.32267 | -3.45657 | -0.31969 |
| C | -7.60028 | -2.32993 | 0.06679  |
| C | 9.00066  | 0.99919  | -1.3406  |
| C | 9.73842  | 2.11292  | -1.69217 |
| C | 9.39309  | 3.37488  | -1.19943 |
| C | 8.30538  | 3.50038  | -0.3376  |

|   |           |          |          |
|---|-----------|----------|----------|
| C | 7.58124   | 2.3692   | 0.03079  |
| C | 7.57218   | -2.45705 | -0.1729  |
| C | 8.2808    | -3.57016 | 0.235    |
| C | 9.34316   | -3.44232 | 1.13541  |
| C | 9.67845   | -2.18231 | 1.62534  |
| C | 8.9444    | -1.0676  | 1.22613  |
| O | 10.17103  | 4.40669  | -1.61466 |
| O | 9.98288   | -4.59395 | 1.46384  |
| O | -10.00256 | 4.63529  | 1.43855  |
| O | -10.15512 | -4.35127 | -1.65246 |
| C | -11.10143 | 4.54987  | 2.31995  |
| C | -9.87044  | -5.6408  | -1.15448 |
| C | 11.05953  | -4.50577 | 2.37235  |
| C | 9.84929   | 5.69788  | -1.1424  |
| C | 1.39944   | 2.48491  | 0.023    |
| N | 1.90727   | 3.51382  | 0.09866  |
| C | -1.34765  | 2.51074  | -0.14484 |
| N | -1.83382  | 3.55041  | -0.21556 |
| H | 3.12302   | -1.50324 | 1.42752  |
| H | 5.5702    | -1.52089 | 1.44245  |
| H | 5.60448   | 1.45284  | -1.65424 |
| H | 3.16232   | 1.49719  | -1.63682 |
| H | -3.13939  | 1.55342  | 1.49872  |
| H | -5.58141  | 1.54611  | 1.50855  |
| H | -5.58272  | -1.42817 | -1.58787 |
| H | -3.13558  | -1.44687 | -1.56616 |
| H | -6.71396  | 2.59783  | -0.81282 |
| H | -8.014    | 4.59718  | -0.10515 |
| H | -10.55141 | 2.09151  | 2.27054  |
| H | -9.24382  | 0.1253   | 1.59148  |
| H | -9.20368  | 0.02383  | -1.75678 |
| H | -10.52063 | -1.98421 | -2.42569 |
| H | -8.05799  | -4.41849 | 0.09745  |
| H | -6.78383  | -2.42951 | 0.77289  |
| H | 9.26497   | 0.02267  | -1.72965 |
| H | 10.58548  | 2.03946  | -2.36256 |
| H | 8.01503   | 4.46159  | 0.0636   |
| H | 6.73948   | 2.46726  | 0.70667  |
| H | 6.75721   | -2.55768 | -0.8805  |
| H | 8.04502   | -4.55755 | -0.14161 |
| H | 10.49592  | -2.05062 | 2.3208   |
| H | 9.20132   | -0.08687 | 1.60939  |
| H | -11.46762 | 5.56606  | 2.44454  |
| H | -10.79896 | 4.1505   | 3.2934   |
| H | -11.89773 | 3.92523  | 1.90222  |
| H | -10.59144 | -6.30933 | -1.61874 |

|   |          |          |          |
|---|----------|----------|----------|
| H | -9.98597 | -5.68055 | -0.06651 |
| H | -8.85705 | -5.95547 | -1.42409 |
| H | 11.42811 | -5.52042 | 2.5025   |
| H | 10.73124 | -4.11134 | 3.33942  |
| H | 11.8623  | -3.87546 | 1.97627  |
| H | 10.57579 | 6.37192  | -1.58975 |
| H | 9.92654  | 5.75201  | -0.05174 |
| H | 8.84122  | 5.99301  | -1.45052 |

(TMS-thio)<sub>2</sub>DCBT Ground State XYZ from DFT Geometry Optimization

Energy = -2843.9624482 Hartrees

No imaginary frequencies were observed

XYZ coordinates

|    |          |          |          |
|----|----------|----------|----------|
| N  | 0.89636  | -2.46236 | -0.40357 |
| C  | 0.55432  | -1.1796  | -0.41693 |
| C  | -0.87273 | -0.98236 | -0.41606 |
| N  | -1.55373 | -2.12114 | -0.41541 |
| S  | -0.47287 | -3.32471 | -0.40202 |
| C  | 1.47205  | -0.06907 | -0.42003 |
| C  | 0.87912  | 1.17615  | -0.41535 |
| C  | -0.55695 | 1.37202  | -0.38756 |
| C  | -1.46053 | 0.32998  | -0.4095  |
| C  | 2.91082  | -0.32177 | -0.41945 |
| C  | -2.90909 | 0.51251  | -0.42344 |
| C  | -3.62193 | 1.51265  | -1.03993 |
| C  | -5.01448 | 1.41916  | -0.80796 |
| C  | -5.37539 | 0.36065  | -0.00837 |
| S  | -3.98439 | -0.55058 | 0.43274  |
| C  | 3.56037  | -1.35606 | -1.05064 |
| C  | 4.95654  | -1.3484  | -0.82327 |
| C  | 5.3816   | -0.33075 | -0.00187 |
| S  | 4.04511  | 0.64263  | 0.47274  |
| Si | 7.13998  | 0.04411  | 0.55797  |
| Si | -7.10727 | -0.11179 | 0.55648  |
| C  | -7.17213 | -0.05196 | 2.42925  |
| C  | -8.28807 | 1.13376  | -0.1956  |
| C  | -7.48811 | -1.84781 | -0.04195 |
| C  | 7.18065  | 0.07118  | 2.43205  |
| C  | 8.22858  | -1.32357 | -0.11909 |
| C  | 7.654    | 1.71224  | -0.12335 |
| C  | 1.67887  | 2.3674   | -0.46972 |
| N  | 2.28461  | 3.343    | -0.52617 |
| C  | -1.0153  | 2.73005  | -0.30754 |
| N  | -1.3554  | 3.82614  | -0.23844 |
| H  | -3.1648  | 2.28074  | -1.64722 |
| H  | -5.73165 | 2.11694  | -1.22083 |
| H  | 3.04614  | -2.08931 | -1.65364 |
| H  | 5.63248  | -2.07782 | -1.25106 |
| H  | -6.92245 | 0.94567  | 2.79714  |
| H  | -6.46405 | -0.75794 | 2.87052  |
| H  | -8.17082 | -0.30899 | 2.79183  |
| H  | -8.05995 | 2.14901  | 0.13768  |
| H  | -9.31502 | 0.90824  | 0.10259  |
| H  | -8.24611 | 1.11441  | -1.28723 |



|   |          |          |          |
|---|----------|----------|----------|
| H | -6.78001 | -2.57016 | 0.37203  |
| H | -7.42933 | -1.90824 | -1.13092 |
| H | -8.49282 | -2.15213 | 0.26274  |
| H | 6.85329  | -0.88554 | 2.84501  |
| H | 6.52413  | 0.84982  | 2.82865  |
| H | 8.19197  | 0.27136  | 2.79534  |
| H | 7.91739  | -2.30217 | 0.25414  |
| H | 9.26636  | -1.16484 | 0.18461  |
| H | 8.20272  | -1.34903 | -1.21119 |
| H | 6.99194  | 2.50457  | 0.23467  |
| H | 7.61825  | 1.71683  | -1.21498 |
| H | 8.67277  | 1.96066  | 0.18551  |

(tolyl)<sub>2</sub>DCBT Ground State XYZ from DFT Geometry Optimization

Energy = -1463.757354 Hartrees

No imaginary frequencies were observed

XYZ coordinates

|   |          |          |          |
|---|----------|----------|----------|
| N | 1.32793  | -2.31339 | -0.15777 |
| C | 0.76327  | -1.10972 | -0.14816 |
| C | -0.67484 | -1.16011 | -0.14812 |
| N | -1.15329 | -2.40109 | -0.14603 |
| S | 0.12327  | -3.3952  | -0.15577 |
| C | 1.46803  | 0.13754  | -0.1536  |
| C | 0.68667  | 1.26594  | -0.17478 |
| C | -0.76321 | 1.21512  | -0.18239 |
| C | -1.46573 | 0.03583  | -0.15271 |
| C | 2.95049  | 0.17696  | -0.17711 |
| C | -2.94591 | -0.04591 | -0.15997 |
| C | 3.70634  | -0.34959 | 0.88137  |
| C | 5.09585  | -0.28072 | 0.78963  |
| C | 5.72518  | 0.28299  | -0.31263 |
| C | 4.96731  | 0.80792  | -1.35205 |
| C | 3.58344  | 0.75764  | -1.27804 |
| C | -3.72992 | 0.51629  | 0.85883  |
| C | -5.11816 | 0.40277  | 0.75141  |
| C | -5.71715 | -0.23997 | -0.32069 |
| C | -4.92993 | -0.80961 | -1.31658 |
| C | -3.55161 | -0.71986 | -1.22644 |
| C | 3.06583  | -0.95728 | 2.10274  |
| C | -3.14986 | 1.20925  | 2.06612  |
| C | 1.3095   | 2.56122  | -0.17451 |
| N | 1.79076  | 3.60505  | -0.17257 |
| C | -1.47627 | 2.45953  | -0.24734 |
| N | -2.04175 | 3.45912  | -0.29909 |
| H | 5.6925   | -0.6707  | 1.60712  |
| H | 6.80708  | 0.32167  | -0.35402 |
| H | 5.44747  | 1.25893  | -2.21123 |
| H | 2.98067  | 1.16713  | -2.0808  |
| H | -5.73504 | 0.82853  | 1.53542  |
| H | -6.79716 | -0.30561 | -0.37552 |
| H | -5.38674 | -1.32203 | -2.15391 |
| H | -2.92608 | -1.16514 | -1.99101 |
| H | 2.13022  | -0.45595 | 2.35895  |
| H | 3.736    | -0.88076 | 2.95923  |
| H | 2.84366  | -2.01345 | 1.93395  |
| H | -2.12358 | 0.90012  | 2.26686  |
| H | -3.75027 | 0.98217  | 2.94798  |
| H | -3.15258 | 2.29319  | 1.92752  |

## 5. Time-Correlated Single Photon Counting Kinetics/Fitting

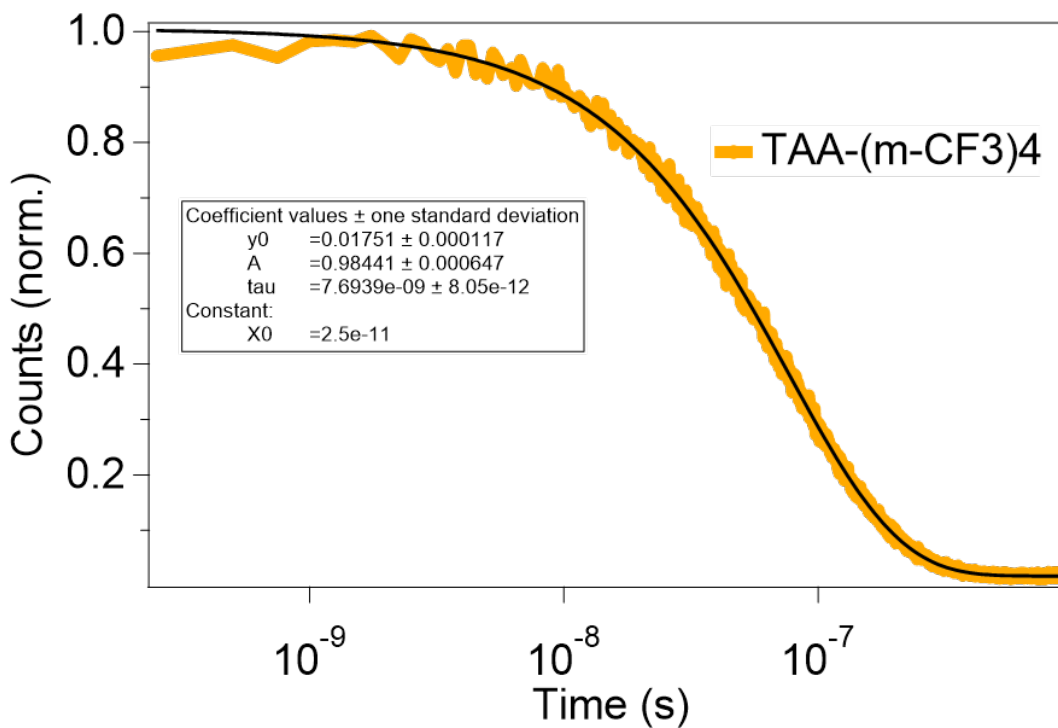

Figure S39. TCSPC decay and fitting parameters for (TAA-(m-CF<sub>3</sub>)<sub>4</sub>)<sub>2</sub>DCBT.

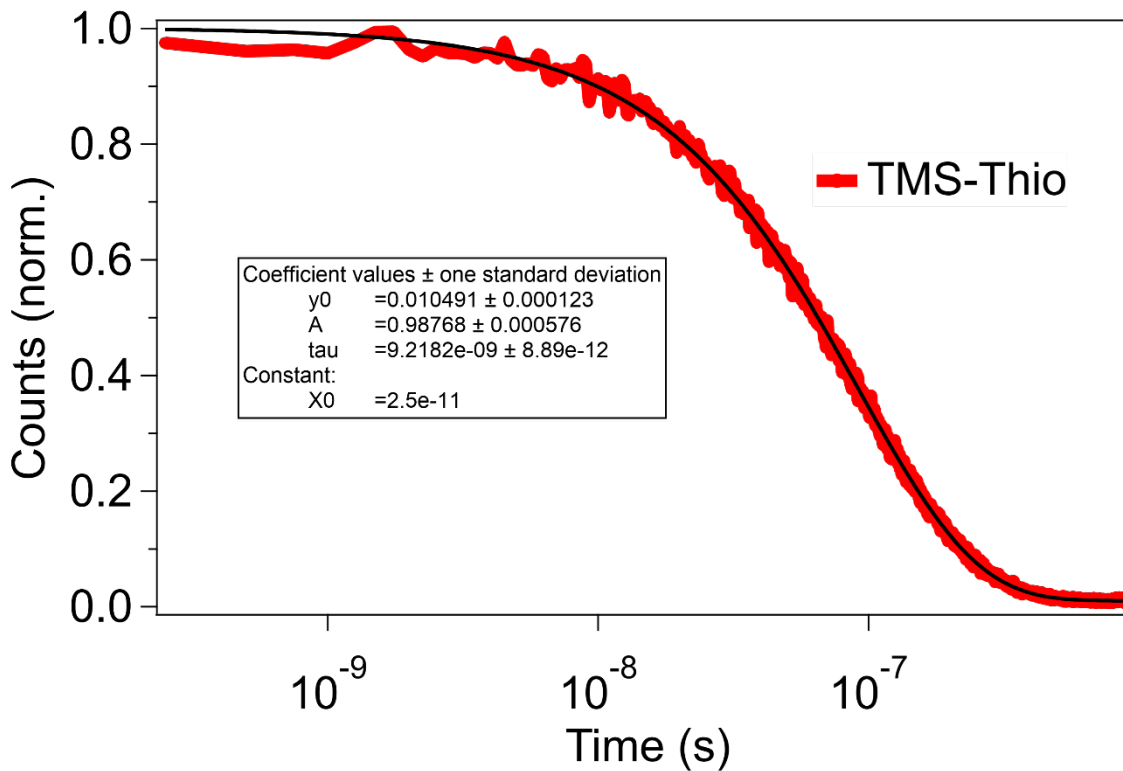

Figure S40. TCSPC decay and fitting parameters for (TMS-thio)<sub>2</sub>DCBT.

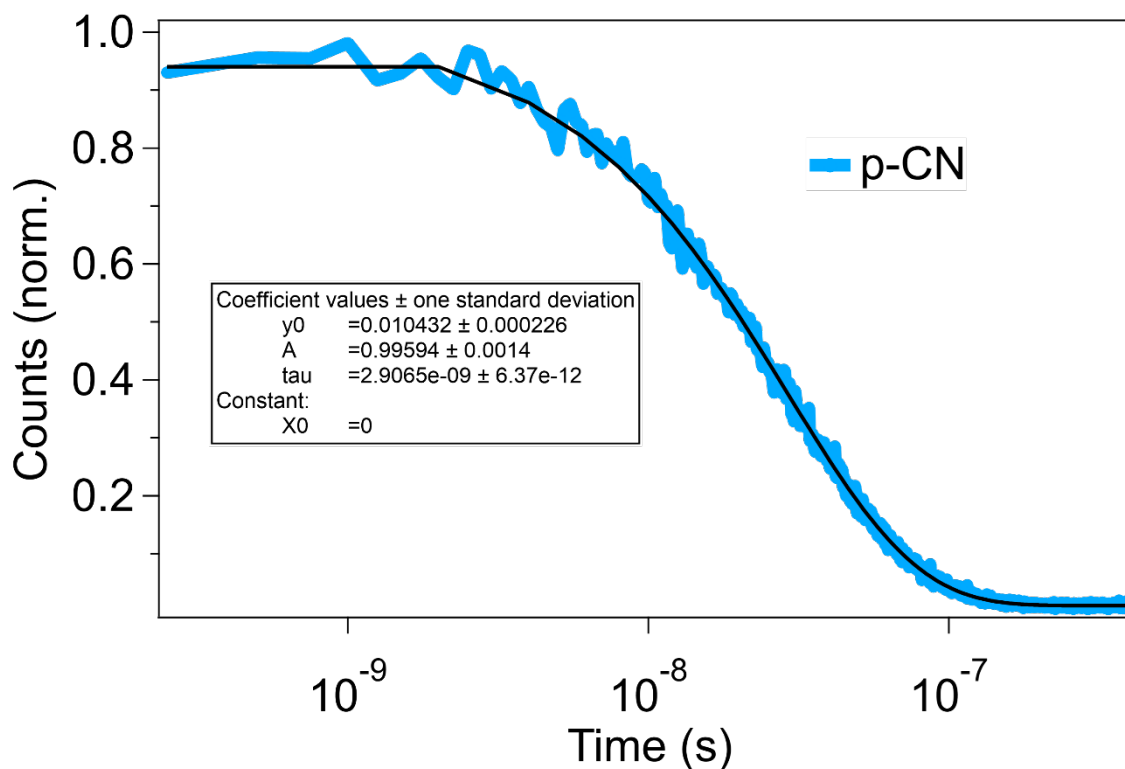

Figure S41. TCSPC decay and fitting parameters for  $(p\text{-CN})_2\text{DCBT}$ .

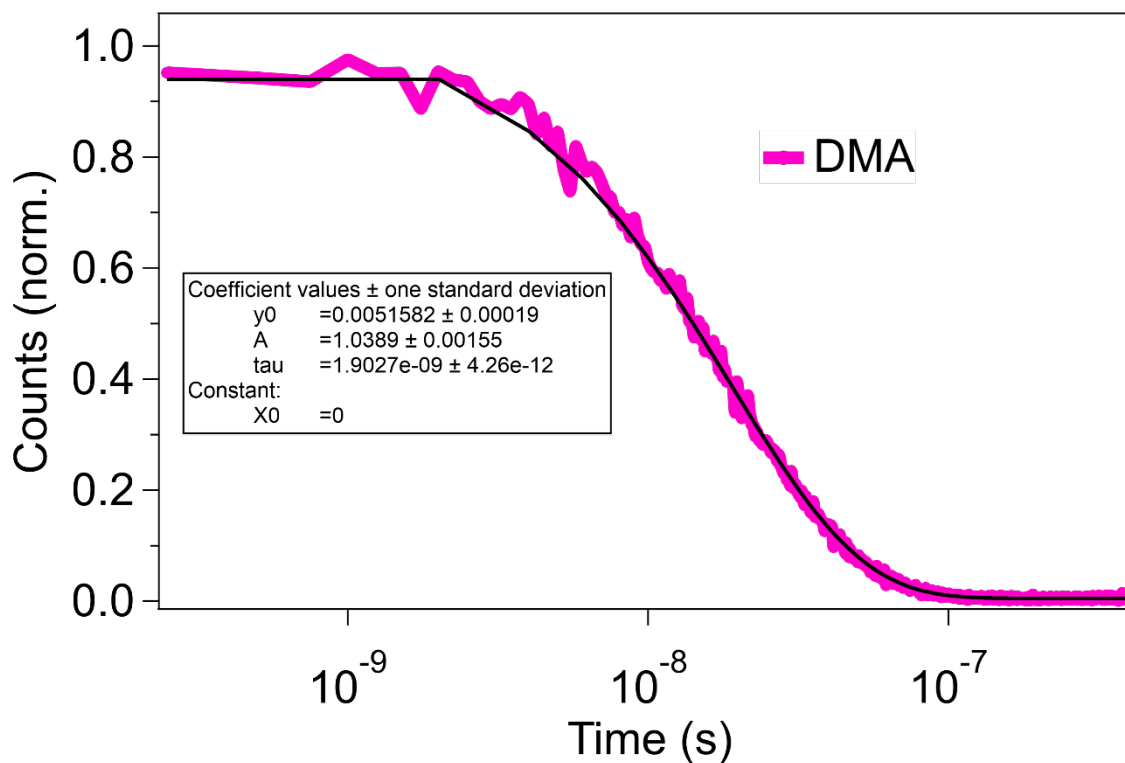

Figure S42. TCSPC decay and fitting parameters for  $(\text{DMA})_2\text{DCBT}$ .

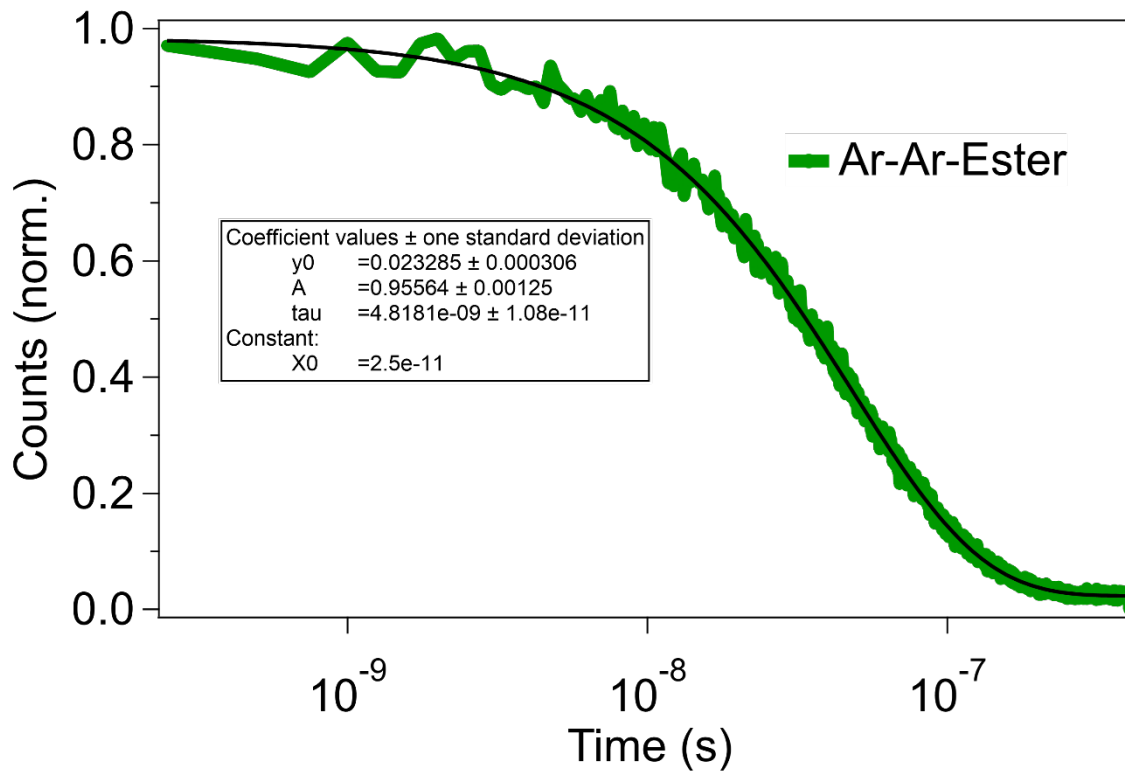

Figure S43. TCSPC decay and fitting parameters for (Ar-Ar-Ester)<sub>2</sub>DCBT.

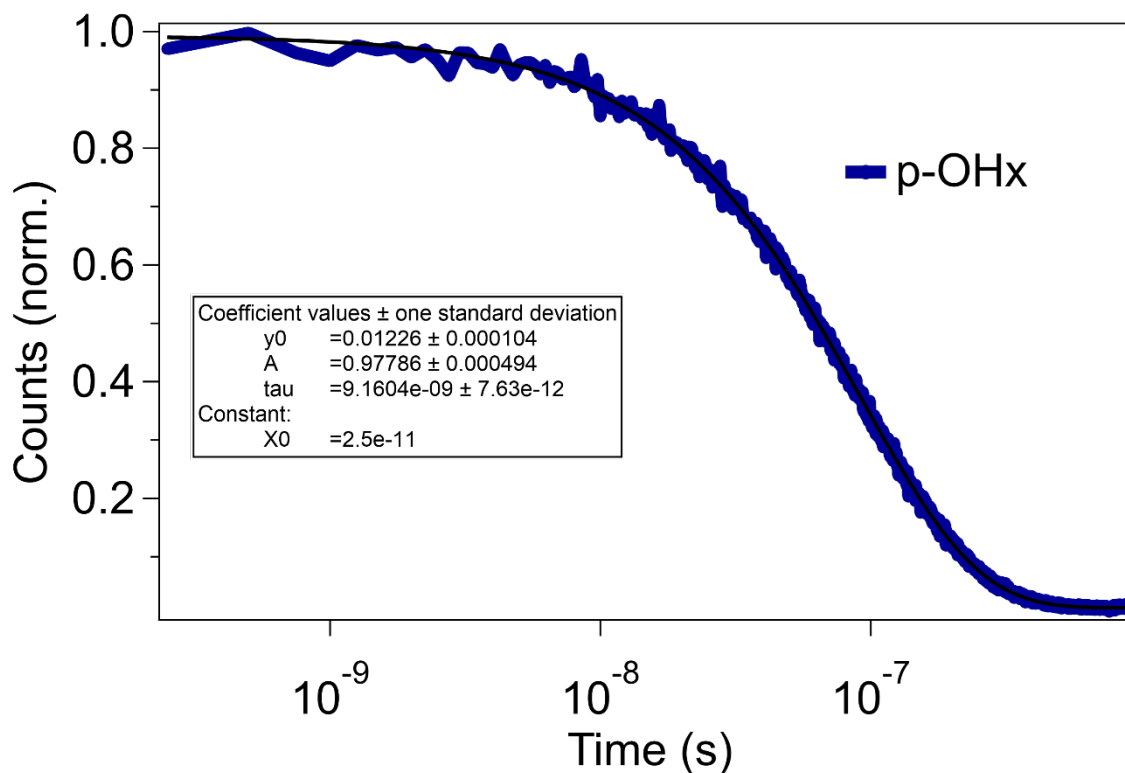

Figure S44. TCSPC decay and fitting parameters for (p-OHx)<sub>2</sub>DCBT.

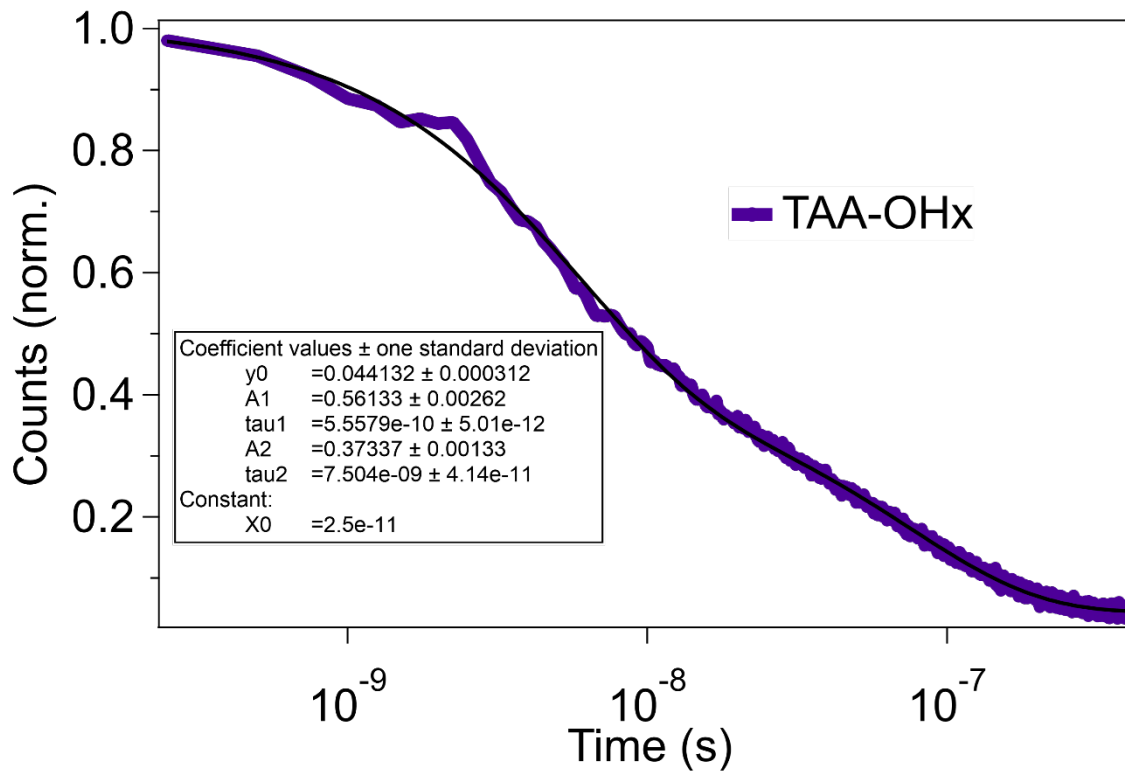

Figure S45. TCSPC decay and fitting parameters for (TAA-OHx)<sub>2</sub>DCBT.

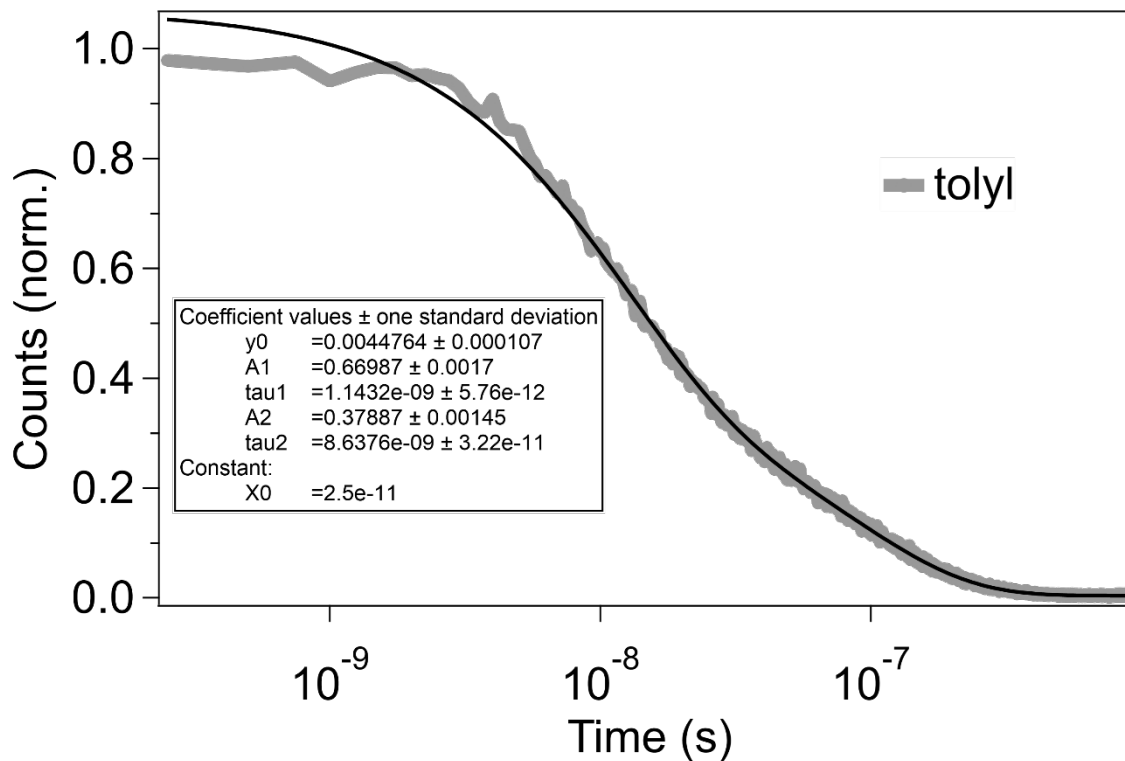

Figure S46. TCSPC decay and fitting parameters for (tolyl)<sub>2</sub>DCBT.
